# Supplementary material for: Prenatal methadone exposure disrupts behavioral development and alters motor neuron intrinsic properties and local circuitry
Source: eLife. 2021 Mar 16;10:e66230. doi: 10.7554/eLife.66230 (PMC7993998; doi:10.7554/eLife.66230)
Supplement: Figure 2—source data 1. [file elife-66230-fig2-data1.xlsx]

## Sheet: Methadone
Dam, Plasma (ng/mL)					Dam, Brain (ng/g)					Offspring, Plasma (ng/mL)																				Offspring, Brain (ng/g)
Dam ID	1	2	3		Dam ID	1	2	3		Pup ID																				Pup ID	11	12	13	14	15	16	17	21	22	23	24	25	26	27	31	32	33	34	35
G18	76.8	41	72.8		G18	327.41	145.25	274.18		G18																				G18	2485.25	1374.05	1752.59	4402.25	1951.99	1890.61	2191.5	1126.44	1686.04	4566.82	1277.85	2129.21	1287.24	2637.11	2126.1	1883.14	2751.79	1513.88	1540.45
Dam ID	4	5	6		Dam ID	4	5	6		Pup ID	41	42	43	44	51	52	53	54	55	61	62	63	64	65	66					Pup ID	41	42	43	44	51	52	53	54	55	61	62	63	64	65	66
P1	16.3	34	14		P1	76.68	126.3	73.85		P1	0.4	0.5	0.5	0.7	0.4	0.2	0.4	0.6	0.6	240.5	1.3	0.2	0.1	0.3	1					P1	9.83	8.46	6.22	10.11	10.14	6.43	5.72	6.94	10.27	8.44	10.37	5.51	5.17	4.08	10.79
Dam ID	7	8	9		Dam ID	7	8	9		Pup ID	71	72	73	74	75	81	82	83	84	85	86	87	91	92	93	94	95	96		Pup ID	71	72	73	74	75	81	82	83	84	85	86	87	91	92	93	94	95
P7	16.5	11.9	19.4		P7	89.17	52.8	76.99		P7	1.1	0.6	0.6	0.5	0.3	0.1	0.8	0.5	0.9	0.8	0.3	0.9	0.2	0.3	0.3	0.7	0.1	0.4		P7	1.64	2.72	2.73	1.22	2	3.37	3.58	4.29	3.57	4.51	4.89	4.98	2.79	2.63	3.46	2.34	2.42
[truncated: 19 more columns]

## Sheet: EDDP
	Dam, Plasma (ng/mL)					Dam, Brain (ng/g)					Offspring, Plasma (ng/mL)																				Offspring, Brain (ng/g)
Dam ID	1	2	3		Dam ID	1	2	3		Pup ID																				Pup ID	11	12	13	14	15	16	17	21	22	23	24	25	26	27	31	32	33	34	35
G18	82.5	33.2	108.2		G18	19.35	12.76	18.14		G18																				G18	48.25	9.23	11.95	204.91	14.26	12.36	14.14	10.03	16.53	59.11	11.86	20.49	9.32	20.77	17.77	13.8	20.37	10.33	14.89
Dam ID	4	5	6		Dam ID	4	5	6		Pup ID	41	42	43	44	51	52	53	54	55	61	62	63	64	65	66					Pup ID	41	42	43	44	51	52	53	54	55	61	62	63	64	65	66
P1	30.2	48.5	37.6		P1	11.04	21.19	18.44		P1	2.1	2.1	4.4	3.1	2.5	2.2	2.5	4.7	1.2	4.4	4.1	2.4	0.7	2.3	8					P1	1.26	0.74	1.31	2	1.3	2.21	0.91	2.72	2.33	1.85	3.19	2.37	1.12	1.09	2.43
Dam ID	7	8	9		Dam ID	4	5	6		Pup ID	71	72	73	74	75	81	82	83	84	85	86	87	91	92	93	94	95	96		Pup ID	71	72	73	74	75	81	82	83	84	85	86	87	91	92	93	94	95
P7	34.4	47.8	39.2		P7	15.17	18.49	14.13		P7	7.4	1	0.8	1.1	1.1	0.2	1.1	2.8	1.2	1.1	1.1	1.5	0.9	1.1	0.8	1.1	0.7	1		P7	0.22	0	0	0	0	0	0	0	0	0	0	0	0	0	0	0	0
[truncated: 19 more columns]

## Sheet: Linear Regressions
	Placental vs Offspring Brain Methadone Concentrations				Offspring Plasma vs Brain Methadone Concentrations at P1				Offspring Plasma vs Brain Methadone Concentrations at P7
Pup ID	Placental (ng/g)	Offspring Brain (ng/g)		Pup ID	Offspring Plasma (ng/mL)	Offspring Brain (ng/g)		Pup ID	Offspring Plasma (ng/mL)	Offspring Brain (ng/g)
14	6512.6	4402.25		41	0.389973	9.82506		71	1.05355	1.63804
15	2693.39	1951.99		42	0.546907	8.46139		72	0.606554	2.72486
16	4055.34	1890.61		43	0.533682	6.22076		73	0.576781	2.72865
17	3607.89	2191.5		44	0.70162	10.115		74	0.538744	1.22165
21	3031.68	1126.44		51	0.427808	10.1439		75	0.276672	2.00059
22	5059.84	1686.04		52	0.205626	6.43077		81	0.100998	3.36977
23	5216.62	4566.82		53	0.444095	5.72293		82	0.824483	3.58067
24	3693.47	1277.85		54	0.623331	6.94287		83	0.481494	4.28889
25	3449.47	2129.21		55	0.566365	10.2722		84	0.914141	3.57176
26	2287.35	1287.24		62	1.3018	10.3748		85	0.760926	4.51227
27	3081.51	2637.11		63	0.19433	5.50674		86	0.279087	4.89207
31	4462.26	2126.1		64	0.0858945	5.17042		87	0.914488	4.98252
32	4348.89	1883.14		65	0.301445	4.08017		91	0.229524	2.78779
33	3042.62	2751.79		66	0.966883	10.7856		92	0.291524	2.63488
34	2857.9	1513.88						93	0.302608	3.4617
35	4147.86	1540.45						94	0.709974	2.3421
36	4106.82	1441.55						95	0.122361	2.42169
