# Supplementary material for: Prenatal methadone exposure disrupts behavioral development and alters motor neuron intrinsic properties and local circuitry
Source: eLife. 2021 Mar 16;10:e66230. doi: 10.7554/eLife.66230 (PMC7993998; doi:10.7554/eLife.66230)
Supplement: Figure 3—source data 1. [file elife-66230-fig3-data1.xlsx]

## Sheet: Maternal Weights
	Opioid Dams (g)																								Saline Weights (g)
PG1	18.5	18.4	19.2	19.6	17.4	18.8	19.2	18.7	17.7	20	18.7	18.1	19	18.4	16.7	18.3	17.8	18.6	19.4	18.1	18.1	18.4	19.2		PG1	17.4	17.1	17.9	16.9	18.8	18	18.1	18.7	18.5	18.9	18.2	17	13.9	18.3	19.5	18.2	17.9	18.6	18.7	18	16.8
	18.5	18.4	19.2	19.6	17.7	19.1	19.4	19.2	17.6	19.5	18.8	18.3	19	18.8	16.4	18.3	17.7	19	19.5	18	18.6	18.2	18.3			17.4	17.1	17.9	16.9	18.7	17.9	18.5	19.1	18.2	19.1	17.8	17.5	18.3	18.8	18.6	18.8	18	18.8	19	18.1	17.2
	17.1	16.5	17.6	17.9	18	19.2	18.5	19	18.3	19.1	18.3	18.1	18.8	17.8	15.8	18.1	18	19.5	19.7	18.7	18.8	18.5	18.4			17.2	16.8	18.1	16.6	19	18.5	18.7	18.8	19.1	19.5	19.2	18.2	19.2	18.5	19.1	18.9	18.3	19.3	18.6	18.6	17.9
	17	16.6	16.7	18.4	18.5	19.6	18.4	19.2	18.9	18.9	18.8	18.1	19.5	18	16.9	18.6	19.1	19.7	20.8	19.2	19.3	19.4	19.1			17.2	17.1	18.4	17.8	19.5	19.4	19.2	20.3	19.6	20.3	19.6	18.2	18.2	20.1	19.3	19.7	18.3	19.3	18.9	18.7	18
	17.5	17.3	17	18.4	18.6	20.1	19	19.8	19.3	19.5	19.2	18.6	19.5	18.5	17	18.7	18.9	20	20.3	19.4	19.8	19.8	19.5			16.8	17.3	18.3	17.5	19.1	18.9	19	19.3	19.5	19.4	19.2	17.9	18.2	19.2	20.5	19.4	18.6	19.4	19.2	19.4	18.3
	17.6	17.5	17.5	18.9	19	20.5	19.3	20.1	19.8	19.7	20	18.5	19.5	18.8	17.5	19	19.5	20.4	20.9	19.9	19.8	20.2	20			17.2	17.9	19.1	17.8	19.1	19.4	19.6	20.4	19.3	20.1	18.7	18.3	18.1	20.3	21.1	20.1	18.9	20.6	19.1	18.5	17.9
~G0	18.8	18.5	19.1	19.9	19	20.7	19.3	20.6	20.3	20	20.2	19	20.4	19.1	17.8	19.5	19.7	20.3	21.1	20.3	20.4	20.4	20.1		~G0	17.5	17.4	18.3	17.3	19.5	20	19.2	20.4	19.9	20.2	19.6	18.9	18.3	19.9	20.6	19.9	19.5	20.1	19.4	18.6	18.2
	20	19.3	19.4	20.7	20.7	21.9	20.3	22.1	20.8	20.9	21	20.2	20.8	19.5	18.5	20	21.5	21	22.1	20.7	22	21.5	21			18.6	18.5	20.8	19.4	21.2	21.5	21.4	21.5	21.6	22.7	20.5	19.7	19.8	22.5	23.1	21.9	20.6	22.2	21.4	19.8	19.8
	19.8	20.1	19.5	21.6	21.1	22.3	20.8	22.7	21.4	21.4	21.2	20.4	20.8	19.5	19.1	20.7	21.6	21.3	22.5	21	22.5	22.3	21.6			19	18.8	21.4	20.1	21.9	22.2	21.8	21.4	21.9	22.9	21	19.8	19.3	22.8	24.4	22.5	21.5	22.9	22.2	20.1	19.7
	21.5	21.2	20.1	22.8	22.3	23.3	21.7	23.8	22.9	22.9	22.2	21.4	22	20.8	19.6	21.2	22.5	22.2	23.3	21.5	24	23.3	22.5			20.6	19.9	23	22.3	23	22.7	22.4	23.1	22.6	24	21.6	20.4	20.4	23.7	24.7	23.9	22.3	23.6	23.5	20.7	20.9
	24.3	23.8	22.3	25.4	25	27.6	24.3	27.2	25.2	26.1	24.9	24.6	23.9	21.9	23.6	23.9	25.5	23.3	24.9	22.7	27.5	26.9	24.9			23.6	22.3	26.9	26.7	26.9	25.7	25.4	25.6	25.4	27.6	22.4	21.5	22.7	27.8	26.7	26.9	26.2	26.6	26.4	22	22.8
	27.1	26	23.9	28.5	28.3	30.2	27.7	30.3	28.8	28.2	28.1	26.7	25.3	24.7	26.4	26.2	28.2	25.4	27.1	24.3	30.5	29.7	27			26	24.9	29.8	30.9	29.5	27.4	27.5	29.1	27.3	30.6	24.5	23.1	24.2	31.1	29.2	29.6	28.9	29.5	29.3	23.5	25
	31	29.3	26.3	31.5	30.9	33.9	31	34.6	31.3	31.7	31.3	31.1	28	27.2	30.2	30.3	31.4	27.4	30	25.8	34.5	33.3	29.7			32.2	27.3	33.1	34.3	33.3	30	32.2	33.4	30.7	35.1	27.8	24.9	26.9	35.3	31	32.7	31.3	32.3	32.5	26.7	27.3
~G19	22.4	22.8	30.2	23.4	35.5	25.8	36.6	34.1	25.5	24.1	25.5	34.9	32.9	32.2	33.5	35.4	36.8	32.3	35.8	30.1	24.1	24.2	22.4		~G19	21.4	32.4	24.5	25.7	25.2	33.2	36.4	39.2	35.9	41.4	32.2	28.3	31.4	26.3	33.1	24.5	23	26	23.4	32.2	31.5
	25	22.9	22	23.2	23.5	25.7	25	26.3	24.3	25.9	26.3	25.8	36.7	28.3	22.9	23.7	24.2	34.7	39.3	32.8	25.5	25.8	23.1			21.2	22	25	25.3	29	24.6	26.4	26.4	25.7	28.6	36.2	31	21.9	27.2	23.8	25.8	22.9	26.3	25.5	34.6	22.5
	23.6	22.4	20.9	22.8	23.9	25.9	25.5	25.9	25.5	26.8	25.8	25.3	26.3	22.5	22.5	23.1	26.3	24.3	26.5	22.2	27.9	26.8	26.4			21.1	22.5	24.2	24.1	28.2	25.5	27.3	26	26.3	29.5	27	24.2	20.7	27.2	25.6	26.8	24.4	27.1	26.7	24.2	23.9
	27.4	25.4	25.3	26.2	25.4	27.7	25.8	28.3	26.4	29.2	27.6	28	27.1	25.9	24.5	24.6	26.8	27.6	28.1	24	28.9	27.1	25.7			22.7	25.3	26.4	26.7	28.5	26.7	29.3	27.8	28.1	31	27.7	25.4	24.5	27.5	27.9	27.6	25.3	27.3	26	25.6	25.2
	28.4	26.7	23.9	26.8	25.8	30.2	27.8	28.2	29.3	28.5	27.9	28.1	26.8	27.3	26	24.7	27.3	26.5	28.1	24	29.9	27.8	26.9			23.8	25.6	26.9	25.5	29.5	27.6	29.5	28.4	29.6	32.3	29.2	26.6	24.4	29	26.7	27.5	25.6	28.6	28	26.7	24.6
	28.5	26.7	24.6	26.7	26	29.6	27.4	28.5	28.2	29.5	27.8	27.3	28.7	26.9	25.4	25	28.3	26.5	28.8	25.5	30.6	29.9	29.2			24	27.1	27.2	27.7	29	27.3	27.7	26.8	28.2	29.3	28.4	25.8	23.5	30.4	28.5	28.9	27.5	29.7	29.4	27.8	26.7
	28.4	26.7	27.5	27.6	26.9	30.4	27.8	29	28	29	27.7	28.5	29	26.9	26.7	26.1	28.5	27.8	29.4	26.5	29.6	27.1	27.8			25.2	26.6	27.4	27.3	29	28.5	28.8	28.3	29.4	31.3	28.7	28.7	25.5	29.7	29.2	28.9	26.4	28.1	26.9	27	26.3
	30.2	27.5	27.4	26.4	26.8	30.1	27.9	29.6	28.8	30.1	28.1	28.5	30.2	27.2	26.6	26.4	28.1	27.7	29.1	26.9	29.4	28.3	27.1			25.3	26.5	27.7	26.2	29.8	27.2	28.3	28.8	28.7	31.3	30	27.9	24.6	29.1	28.2	28.3	25.7	26.9	28	28.3	26.3
	28.3	26.8	26.3	27.9	27.1	30.8	29.2	29.2	28.3	28.4	28.1	27.9	29	27.7	26.4	26.4	28.7	27.6	30	26.7	29.2	29	26.5			23.4	25.8	26.8	25.7	28.7	26.8	30.1	27.4	30.7	30.3	29.3	28.2	25.3	30.5	27.3	27.6	25.5	29.1	28.1	29.2	26.5
~P21	27.2	26.6	27.5	27	25.5	30.5	28.2	28.1	29	28.9	27.4	27	28.2	28.4	26.7	26.4	28.6	28.2	30.2	26.1	28.6	28.3	25.6		~P21	23.7	27.9	25.8	23.4	28.8	27.6	30.2	27.5	29.8	31	30.6	26.6	24.2	26.4	27	27.7	24.4	27.7	25.5	26.8	25.8

## Sheet: Maternal Food Consumption
	Opioid																				Saline
PG Week 1	1.38103	1.1883	1.21302	1.12513	1.40791	1.049	1.19572	1.30994	1.23895	1.09674	1.33114	1.2175	1.141	1.0226	1.0108	1.2442	1.1602	1.0804	0.9823		PG Week 1	1.11064	1.34111	1.09392	1.08503	1.20216	1.24868	1.33516	1.35353	1.0557	0.8513	1.1786	0.9944	1.2	1.1551	0.9383	1.0476
PG Week 2	1.11243	1.10051	0.632065	0.959375	1.08201	1.1582	0.997872	1.34144	1.08308	1.01944	1.03728	1.2017	1.15	1.0836	1.0827	1.2059	1.1372	1.1481	0.9685		PG Week 2	1.08154	1.26546	1.06927	1.06207	1.15969	1.18966	1.17551	1.31099	1.1222	0.9445	1.0868	1.1186	1.1881	1.1462	1.0199	1.1084
PG Week 3	1.15947	1.17343	1.09689	1.13592	1.08786	1.09803	1.149	1.21238	1.23947	1.07304	1.13194	1.10211	1.16872	1.02059	1.07943	1.22613	1.10859	1.12178	1.0525		PG Week 3	0.996923	0.885	1.07135	1.0902	1.08744	1.1099	0.906633	1.16561	1.067	1.08341	1.10746	1.07407	1.09612	0.879058	0.972432	1.01061
G Week 1																					G Week 1
G Week 2	0.9392	0.872101	0.87572	0.816544	0.87619	0.849425	0.91004	0.95935	1.05105	0.914155	0.87839	1.0443	1.1524	1.0685	1.0253	1.1679	1.0471	1.1511	1.032		G Week 2	0.890335	0.884436	0.870472	0.916406	0.979134	0.942754	0.938393	0.955814	1.0949	0.9583	1.0954	1.1632	1.1894	1.0396	0.9908	1.1866
G Week 3	0.910356	0.928319	0.908387	0.897399	0.899361	0.961514	0.995527	1.05048	1.085	1.04412	0.916887	1.09427	1.17624	1.21496	1.13432	1.38354	1.05115	1.14478	1.04333		G Week 3	0.900601	0.902333	0.88913	0.90509	1.01303	0.939886	1.03525	1.11847	1.04437	0.837329	1.00338	0.995502	1.13356	1.02355	1.17532	1.2028
P Week 1	1.69724	2.25776	1.9655	1.77597	2.23902	2.20479	2.21196	2.04393	1.58192	1.62317	2.11755	2.171	2.32433	1.60165	1.84302	1.38153	2.75556	2.625	2.06856		P Week 1	2.16596	1.43296	1.84198	1.70612	1.4331	2.02	1.31155	1.25039	2.56029	2.04648	2.30112	2.01516	2.21661	2.18764	1.68719	1.75314
P Week 2	2.5145	2.86415	2.82302	2.54	2.7275	2.97172	2.90217	2.94702	3.04345	2.71673	3.0427	2.7692	3.10495	2.74377	2.94306	2.15882	3.15196	2.98395	2.14897		P Week 2	2.79966	1.92737	2.80382	2.34134	2.4636	2.75527	2.52195	2.06307	2.95493	2.51193	2.76055	2.25236	2.61852	2.5602	2.57806	2.49176
P Week 3	2.03059	2.50066	2.65	2.2363	2.26828	2.5692	2.5365	2.69926	2.86135	2.57641	2.61348	2.72311	2.86167	2.64094	2.97633	2.19588	3.4274	3.26621	2.1517		P Week 3	2.40799	1.67754	2.5543	2.10182	2.2906	2.40807	2.62092	2.30451	3.1341	2.39414	2.69783	2.15726	2.59072	2.66192	2.69315	2.20453

## Sheet: Maternal Care
				Nest Quality				Average Pup Retrieval
				Methadone	Saline			Methadone	Saline
				5	5			30.6667	38.3333
				4	4			38.6667	12.3333
				5	5			45	52.6667
				4	5			23.4	79.6667
				4	5			9.4	12.1
				4	5			23.03	26.16
				3	4			33.3	26.16
				5	4			79.9	44.07
				3	4			30.2	29.3
				5	4			45.5	53.1
				3	5			32.6	23.5
				4	5			120	49.9
					4				41

## Sheet: Maternal Withdrawal 
	Opioid								Saline
Pre-Gestational (Oxycodone Ony)	10.2	23.35	15.1	33	7.15	31.8	43.1		0	4.8	1.5	1	0.8	4.2	3
Post-Weaning (Oxycodone then methadone)	34.35	16.5	21.7	36.55	18.45	19	21.6	19.45	24.75	1.05	5.45	6.45	2.75	1.75	2.4	2.55
