# Supplementary material for: Prenatal methadone exposure disrupts behavioral development and alters motor neuron intrinsic properties and local circuitry
Source: eLife. 2021 Mar 16;10:e66230. doi: 10.7554/eLife.66230 (PMC7993998; doi:10.7554/eLife.66230)
Supplement: Figure 4—figure supplement 1—source data 1. [file elife-66230-fig4-figsupp1-data1.xlsx]

## Sheet: P7 Bone
				Sex	Treatment	Mineralized Femur Length (mm)	Whole Bone Volume (mm3)
				Male	Methadone	4.42	0.59362
				Male	Methadone	3.96	0.44374
				Male	Methadone	3.93	0.40355
				Female	Methadone	4.53	0.49082
				Female	Methadone	4.43	0.47077
				Female	Methadone	4.51	0.56887
				Female	Methadone	4.53	0.45151
				Male	Methadone	4.38	0.54771
				Male	Methadone	4.12	0.30018
				Male	Methadone	4.04	0.53906
				Female	Methadone	4.31	0.50074
				Female	Methadone	4.11	0.3878
				Female	Methadone	4.19	0.44502
				Male	Saline	4.52	0.72278
				Male	Saline	4.57	0.63885
				Male	Saline	4.53	0.69062
				Female	Saline	4.45	0.60479
				Female	Saline	4.58	0.69985
				Female	Saline	4.57	0.74314
				Male	Saline	4.29	0.54367
				Male	Saline	4.1	0.36275
				Male	Saline	4.11	0.36536
				Female	Saline	3.97	0.37268
				Female	Saline	4.4	0.51329
				Female	Saline	4.27	0.46086

## Sheet: P35 Bone
Sample	Sex	Treatment	Distal Metaphysis Bone Volume		Sample ID	Sex	Treatment	BV/TV		Sample ID	Sex	Treatment	Bone Area	Cortical Thickness
MF2	Female	Methadone	0.25998		MF2	Female	Methadone	4.55697		MF2	Female	Methadone	0.44331	0.10562
MF3	Female	Methadone	0.34837		MF3	Female	Methadone	5.45601		MF3	Female	Methadone	0.44337	0.09943
MF4	Female	Methadone	0.39253		MF4	Female	Methadone	4.83956		MF4	Female	Methadone	0.46175	0.10282
MF5	Female	Methadone	0.44333		MF5	Female	Methadone	5.86492		MF5	Female	Methadone	0.49379	0.10916
MF6	Female	Methadone	0.36957		MF6	Female	Methadone	4.83861		MF6	Female	Methadone	0.45525	0.1068
MM1	Male	Methadone	0.45357		MM1	Male	Methadone	8.11174		MM1	Male	Methadone	0.49909	0.11084
MM2	Male	Methadone	0.47887		MM2	Male	Methadone	10.8784		MM2	Male	Methadone	0.55928	0.12555
MM3	Male	Methadone	0.50667		MM3	Male	Methadone	10.4923		MM3	Male	Methadone	0.55523	0.1197
MM4	Male	Methadone	0.42889		MM4	Male	Methadone	7.83822		MM4	Male	Methadone	0.49522	0.11366
MM5	Male	Methadone	0.50665		MM5	Male	Methadone	9.75727		MM5	Male	Methadone	0.56828	0.12478
SF1	Female	Saline	0.40616		SF1	Female	Saline	4.63137		SF1	Female	Saline	0.44917	0.09962
SF2	Female	Saline	0.40688		SF2	Female	Saline	6.35105		SF2	Female	Saline	0.49126	0.11075
SF3	Female	Saline	0.44173		SF3	Female	Saline	7.70582		SF3	Female	Saline	0.5119	0.11349
SF4	Female	Saline	0.44094		SF4	Female	Saline	6.96429		SF4	Female	Saline	0.45806	0.1102
SF5	Female	Saline	0.43125		SF5	Female	Saline	5.83033		SF5	Female	Saline	0.49317	0.10455
SM1	Male	Saline	0.43548		SM1	Male	Saline	9.6662		SM1	Male	Saline	0.47826	0.11255
SM2	Male	Saline	0.47245		SM2	Male	Saline	8.54947		SM2	Male	Saline	0.52781	0.12169
SM3	Male	Saline	0.52001		SM3	Male	Saline	12.3604		SM3	Male	Saline	0.57541	0.12033
SM4	Male	Saline	0.54127		SM4	Male	Saline	13.5749		SM4	Male	Saline	0.52871	0.12462
SM5	Male	Saline	0.39642		SM5	Male	Saline	6.04196		SM5	Male	Saline	0.46022	0.10618
