# Supplementary material for: Prenatal methadone exposure disrupts behavioral development and alters motor neuron intrinsic properties and local circuitry
Source: eLife. 2021 Mar 16;10:e66230. doi: 10.7554/eLife.66230 (PMC7993998; doi:10.7554/eLife.66230)
Supplement: Figure 4—figure supplement 2—source data 1. [file elife-66230-fig4-figsupp2-data1.xlsx]

## Sheet: Craniofacial Development
					Treatment	Sex	Incisor Eruption	Eye Opening	Ear Opening		mom	Sex	Incisor Eruption	Eye Opening	Ear Opening
					PSE	F	6	14	14		PME	F	7	15	14
					PSE	F	7	14	14		PME	F	7	14	14
					PSE	F	8	15	16		PME	F	7	15	15
					PSE	F	8	16	16		PME	F	7	14	14
					PSE	F	8	14	14		PME	F	7	14	14
					PSE	F	8	14	14		PME	F	8	14	14
					PSE	F	8	14	14		PME	F	7	15	14
					PSE	F	8	14	14		PME	F	7	14	14
					PSE	F	8	14	14		PME	F	8	14	14
					PSE	F	8	14	14		PME	F	8	15	14
					PSE	M	7	14	14		PME	F	7	15	14
					PSE	M	7	14	14		PME	F	7	16	14
					PSE	M	7	14	14		PME	F	8	16	14
					PSE	M	7	14	14		PME	F	8	14	14
					PSE	M	6	14	14		PME	F	7	14	14
					PSE	M	8	16	16		PME	F	7	15	14
					PSE	M	8	14	14		PME	F	8	14	14
					PSE	M	8	15	15		PME	F	8	17	17
					PSE	M	8	14	14		PME	F	7	14	14
					PSE	M	8	15	15		PME	M	8	14	14
					PSE	M	8	14	14		PME	M	7	15	14
					PSE	M	8	14	14		PME	M	7	14	14
					PSE	M	8	14	14		PME	M	9	15	14
					PSE	M	8	14	14		PME	M	8	14	14
					PSE	M	8	14	14		PME	M	7	14	14
											PME	M	8	15	14
