# Supplementary material for: Prenatal methadone exposure disrupts behavioral development and alters motor neuron intrinsic properties and local circuitry
Source: eLife. 2021 Mar 16;10:e66230. doi: 10.7554/eLife.66230 (PMC7993998; doi:10.7554/eLife.66230)
Supplement: Figure 4—source data 1. [file elife-66230-fig4-data1.xlsx]

## Sheet: P1-P21 Weight
	PME-Males (g)																										PME-Females (g)
P0	1.24	1.17	1.05	1.19	1.35	1.21	1.3	1.19	1.28	1.41	1.27	1.16	1.29	1.13	1.3	1.31	1.3	1.19	1.29	1.28	1.14	1.25	1.14	1.2	1.17		1.15	1.25	1.14	1.24	1.09	1.22	1.21	1.4	1.26	1	1.27	1.23	1.23	1.25	1.19	1.16	1.3	1.34	1.17	1.15	1.18	1.24	1.24
P3	1.78	1.69	1.5	1.68	1.93	1.77	1.92	1.79	1.94	2.25	2.03	1.82	2.09	1.84	2.02	2.02	2.06	1.39	1.69	1.61	1.28	1.68	1.51	1.43	1.03		1.66	1.77	1.63	1.9	1.62	1.92	1.82	2.1	2.09	1.49	1.98	1.9	1.93	1.54	1.6	1.11	1.47	1.71	1.5	1.24	1.57	1.41	1.49
P7	3.3	3.33	2.89	3.14	3.59	3.42	3.45	3.21	3.62	4.1	3.74	3.33	3.97	3.49	3.58	3.83	3.8	2.77	2.88	2.8	2.25	3.12	2.74	2.49	1.09		3.06	3.34	2.97	3.41	3.15	3.67	3.29	3.97	3.83	2.83	3.8	3.5	3.75	3.05	2.88	1.69	2.83	3.12	2.94	2.08	2.76	2.51	2.7
P10	4.59	4.63	4.23	4.72	5.15	4.97	5.08	4.61	5.18	5.82	5.49	4.83	5.52	5.18	4.61	5.2	5.11	3.96	3.38	3.85	2.75	4.28	3.8	3.47	1.65		4.52	4.78	4.32	4.81	4.4	5.07	4.76	5.49	5.39	4.46	5	4.84	4.83	4.13	4.04	2.53	3.88	4.17	4.15	2.82	4.05	3.73	3.97
P14	6	6.18	5.65	6.33	6.8	6.24	6.8	6.08	6.69	7.6	7.31	6.47	7.54	6.81	5.78	6.84	6.72	5.23	3.96	5.41	3.75	5.65	5.11	4.69	2.13		5.99	6.46	5.79	6.32	5.83	6.64	6.23	7.05	6.96	6.39	6.8	6.66	6.15	5.25	5.58	3.07	5.06	5.5	5.41	3.6	5.05	4.72	5.26
P18	6.48	6.69	6.08	6.68	7.5	6.92	7.52	6.64	7.32	7.94	7.86	7.06	8.28	7.75	6.8	7.51	7.48	6.02	4.59	5.75	4.24	6.33	5.73	5.39	2.86		6.43	6.86	6.4	6.96	6.44	7	6.79	7.53	7.33	7.4	7.42	7.22	6.6	5.8	6.11	3.61	5.73	6.35	6.13	4.23	5.53	5.17	5.72
P21	6.74	7.03	6.22	7.14	7.98	7.13	7.78	6.76	7.39	8.84	8.35	7.62	9.22	8.11	7.4	8.42	8.24	6.6	5.4	6.23	4.67	7.6	6.6	6.01	3.11		6.66	7.73	6.55	7.49	6.6	7.24	6.77	7.78	7.7	7.35	7.86	7.89	6.61	6.17	6.63	3.85	6.22	6.94	6.65	4.72	6.17	5.66	6.28
[truncated: 65 more columns]

## Sheet: Adolescent Weight
	PME-Male																	PME-Female															PSE-Male																PSE-Female
P35	18.1	18.1	19.5	22	17.7	19.1	18.9	18.8	18	18.6	21.6	20.1	22.1	18.6	18.7	18.7		18.1	17.1	17.2	17.8	19.4	14.6	14.6	16.9	15.4	15.3	15.7	15.7	16.3	15.5		18	18.8	19.5	21.7	20.9	21.9	19.6	21.2	20.2	19.9	21.1	20.5	18.7	21	21.1		18.3
P49	20.3	21.2	22.5	24.2	21.2	22.5	22	22.9	22.4	22.2	24.8	24.4	25.2	21.6	22.8	22.7		19.5	18.6	19.7	18.9	21	17.4	17.5	18.5	17.7	16.8	18.9	17.2	17.8	17.2		21.5	22.9	22.7	23.7	24.3	25	22.9	24.9	23.7	23	23.7	23.4	23.6	24.1	23.2		18.9
[truncated: 8 more columns]

## Sheet: P1-P21 Legnth
	PME-Male (mm)																										PME-Female (mm)
P0	26	28	27	27	27	27	28	27	27	27	24	27	28	27	27	26	27	28	28	25	28	26	27	37	28		29	27	27	27	29	27	25	27	28	28	27	27	28	28	28	27	27	26	28	26	26	26	37
P3	29	32	30	28	33	32	30	27	32	32	30	32	35	32	33	31	34	35	34	33	34	33	34	33	34		30	31	27	30	31	30	28	31	31	31	31	33	32	33	32	31	32	26	31	27	33	31	33
P7	38	38	37	35	40	38	37	28	39	40	38	39	39	40	40	39	40	43	40	40	41	39	40	39	41		40	39	32	38	39	38	35	38	39	38	37	39	39	38	39	37	38	32	38	39	40	38	41
P10	42	41	42	39	44	43	42	31	45	44	43	44	46	46	45	44	46	48	46	44	48	44	47	45	48		43	44	37	43	43	44	39	43	42	43	44	43	44	45	43	42	43	37	42	44	46	43	44
P14	48	47	50	44	51	48	47	35	52	53	52	52	55	54	53	54	54	57	58	52	58	56	56	58	57		50	49	42	48	52	50	43	49	48	50	49	49	48	50	50	49	50	42	51	52	53	53	55
P18	54	50	55	49	59	55	54	40	57	60	54	58	62	56	61	58	60	63	62	60	62	61	59	62	62		56	57	45	55	56	58	48	55	55	55	56	58	55	56	55	54	57	47	58	57	60	55	59
P21	62	55	56	52	61	58	56	43	57	59	57	60	62	57	61	55	61	63	64	61	66	64	61	64	63		57	60	48	59	58	59	54	58	56	58	57	60	59	59	59	56	57	48	58	58	60	55	59
[truncated: 65 more columns]
