# Supplementary material for: Prenatal methadone exposure disrupts behavioral development and alters motor neuron intrinsic properties and local circuitry
Source: eLife. 2021 Mar 16;10:e66230. doi: 10.7554/eLife.66230 (PMC7993998; doi:10.7554/eLife.66230)
Supplement: Figure 5—figure supplement 1—source data 1. [file elife-66230-fig5-figsupp1-data1.xlsx]

## Sheet: P1 Activity 
					Group	Sex	Roll Over	Time to Roll (sec)		Group	Sex	Roll Over	Time to Roll (sec)
					PME	F	0	300		PSE	F	0	300
					PME	F	1	38		PSE	F	1	0
					PME	F	1	191		PSE	F	1	171
					PME	F	1	0		PSE	F	1	41
					PME	F	1	79		PSE	F	0	300
					PME	F	1	0		PSE	F	1	115
					PME	F	1	155		PSE	F	1	0
					PME	F	1	0		PSE	F	1	292
					PME	F	1	0		PSE	F	1	116
					PME	F	1	0		PSE	F	1	225
					PME	F	1	0		PSE	M	1	0
					PME	F	0	300		PSE	M	1	16
					PME	F	1	0		PSE	M	0	300
					PME	F	1	0		PSE	M	1	0
					PME	F	0	300		PSE	M	1	108
					PME	F	1	0		PSE	M	0	300
					PME	F	1	215		PSE	M	1	182
					PME	F	1	0		PSE	M	1	0
					PME	F	1	125		PSE	M	1	0
					PME	M	1	256		PSE	M	1	300
					PME	M	1	0		PSE	M	1	14
					PME	M	1	253		PSE	M	1	156
					PME	M	1	0		PSE	M	1	146
					PME	M	1	0		PSE	M	1	0
					PME	M	1	225		PSE	M	0	300
					PME	M	1	0
