# Supplementary material for: Prenatal methadone exposure disrupts behavioral development and alters motor neuron intrinsic properties and local circuitry
Source: eLife. 2021 Mar 16;10:e66230. doi: 10.7554/eLife.66230 (PMC7993998; doi:10.7554/eLife.66230)
Supplement: Figure 5—figure supplement 2—source data 1. [file elife-66230-fig5-figsupp2-data1.xlsx]

## Sheet: Open Field Behaviors
					Group	Sex	Percent Grooming	Supported Rearing	Unsupported Rearing		Group	Sex	Percent Grooming	Supported Rearing	Unsupported Rearing		Time spent near arena walls
					PME	F	0.0609617	18	16		PSE	F	0.325623	10	20			PME-Female																				PME-Male								PSE-Female
					PME	F	0.0123333	12	13		PSE	F	0.312428	9	18		P7	238.368	0	0	213.249	68.9618	0	200.378	159.745	74.2085	151.6	0	169.939	216.494	168.725	81.6972	110.384	16.5593	282.877	250.128	P7	153.382	98.5897	49.0783	0	291.704	0	7.96226	P7	1.09951	0	87.3278	117.581
					PME	F	0.174695	10	22		PSE	F	0.12999	12	34		P14	278.61	300.034	299.168	253.388	297.169	291.105	290.238	298.768	296.702	287.174	293.571	246.491	238.035	288.973	297.635	297.269	291.571	299.101	285.942	P14	298.368	293.204	292.737	292.471	290.838	297.935	299.101	P14	195.492	296.603	300.034	173.257
					PME	F	0.151846	15	19		PSE	F	0.26278	13	27		P21	236.762	239.101	242.493	275.078	191.815	277.744	198.934	234.096	243.792	289.905	171.424	227.366	110.551	280.809	283.941	271.316	279.24	272.383	233.071	P21	234.596	249.483	241.966	277.877	262.75	249.65	263.483	P21	280.476	199.889	268.91	253.221
					PME	F	0.0134304	15	23		PSE	F	0.104423	20	27
					PME	F	0.213905	7	8		PSE	F	0.138577	10	17
					PME	F	0.203265	8	10		PSE	F	0.160153	12	19
					PME	F	0.356813	4	19		PSE	F	0.310513	15	15
					PME	F	0.257442	13	24		PSE	F	0.32975	11	18
					PME	F	0.199618	20	12		PSE	F	0.100831	23	28
					PME	F	0.261217	17	18		PSE	M	0.558237	6	18
					PME	F	0.0274177	19	30		PSE	M	0.47503	5	19
					PME	F	0	10	9		PSE	M	0.334642	13	22
					PME	F	0.179651	18	16		PSE	M	0.211437	15	19
					PME	F	0.0417413	11	18		PSE	M	0.277529	15	19
					PME	F	0.104448	21	26		PSE	M	0.114514	20	20
					PME	F	0.110074	14	5		PSE	M	0.162903	17	20
					PME	F	0	30	5		PSE	M	0.271534	15	17
					PME	F	0.146392	10	15		PSE	M	0.170738	10	21
					PME	M	0.0955093	10	21		PSE	M	0.253397	16	18
					PME	M	0.085078	13	15		PSE	M	0.0191	25	25
					PME	M	0	21	22		PSE	M	0.157679	19	16
					PME	M	0.036767	20	22		PSE	M	0.288332	9	11
					PME	M	0.220408	7	14		PSE	M	0.184105	4	18
					PME	M	0.180051	18	11		PSE	M	0.145194	16	22
					PME	M	0.221348	7	13
[truncated: 22 more columns]
