# Supplementary material for: Prenatal methadone exposure disrupts behavioral development and alters motor neuron intrinsic properties and local circuitry
Source: eLife. 2021 Mar 16;10:e66230. doi: 10.7554/eLife.66230 (PMC7993998; doi:10.7554/eLife.66230)
Supplement: Figure 5—figure supplement 3—source data 1. [file elife-66230-fig5-figsupp3-data1.xlsx]

## Sheet: USV
				Group	Sex	P1	P7	P14	P21			Group	Sex	P1	P7	P14	P21
				PME	F	0	198	15	40			PSE	F	15	15	138	1
				PME	F	0	142	65	3			PSE	F	0	40	32	0
				PME	F	17	285	22	0			PSE	F	1	24	113	12
				PME	F	0	212	13	7			PSE	F	17	26	43	0
				PME	F	10	94	13	0			PSE	F	55	47	56	11
				PME	F	15	38	60	4			PSE	F	12	15	16	8
				PME	F	15	15	13	2			PSE	F	38	3	30	1
				PME	F	0	242	124	1			PSE	F	15	41	100	1
				PME	F	0	214	53	0			PSE	F	21	31	59	0
				PME	F	19	40	7	3			PSE	F	44	111	28	3
				PME	F	0	4	8	1			PSE	M	1	86	28	0
				PME	F	0	53	438	10			PSE	M	1	61	39	0
				PME	F	0	11	45	2			PSE	M	0	14	23	0
				PME	F	1	17	58	33			PSE	M	2	13	34	0
				PME	F	0	98	40	11			PSE	M	3	18	4	3
				PME	F	0	40	67	0			PSE	M	0	50	118	0
				PME	F	1	156	12	3			PSE	M	96	6	6	5
				PME	F	0	138	6	1			PSE	M	3	2	49	10
				PME	F	0	26	14	0			PSE	M	9	14	88	4
				PME	M	0	13	35	0			PSE	M	9	13	15	39
				PME	M	0	14	9	0			PSE	M	5	43	58	1
				PME	M	1	118	0	0			PSE	M	0	97	20	5
				PME	M	10	14	3	0			PSE	M	0	49	217	5
				PME	M	2	135	67	0			PSE	M	30	43	3	6
				PME	M	0	35	5	0			PSE	M	0	31	24	1
				PME	M	0	13	106	0
