# Supplementary material for: Prenatal methadone exposure disrupts behavioral development and alters motor neuron intrinsic properties and local circuitry
Source: eLife. 2021 Mar 16;10:e66230. doi: 10.7554/eLife.66230 (PMC7993998; doi:10.7554/eLife.66230)
Supplement: Figure 5—figure supplement 4—source data 1. [file elife-66230-fig5-figsupp4-data1.xlsx]

## Sheet: P7 locomotion vs activity
				P7 Distance traveled vs USV calls					P7 Distance traveled vs USV calls
				Group	Sex	Calls	Total Distance Traveled (cm)		Group	Sex	Calls	Total Distance Traveled (cm)
				PME	F	198	41.1547		PSE	F	15	41.0244
				PME	F	142	21.5676		PSE	F	40	6.52559
				PME	F	285	42.0969		PSE	F	24	5.53137
				PME	F	212	23.3996		PSE	F	26	22.4861
				PME	F	94	5.17881		PSE	F	47	13.7941
				PME	F	38	13.401		PSE	F	15	16.1584
				PME	F	15	74.158		PSE	F	3	18.2548
				PME	F	242	50.5264		PSE	F	41	13.4307
				PME	F	214	64.6481		PSE	F	31	7.94236
				PME	F	40	2.52009		PSE	F	111	16.7599
				PME	F	4	1.24162		PSE	M	86	11.0992
				PME	F	53	14.4768		PSE	M	61	31.199
				PME	F	11	51.6492		PSE	M	14	7.35423
				PME	F	17	12.1307		PSE	M	13	16.4055
				PME	F	98	30.7971		PSE	M	18	1.17593
				PME	F	40	35.7082		PSE	M	50	19.4527
				PME	F	156	26.3163		PSE	M	6	1.16303
				PME	F	138	24.0265		PSE	M	2	0.327107
				PME	F	26	15.3957		PSE	M	14	12.2631
				PME	M	13	44.1326		PSE	M	13	0.813731
				PME	M	14	45.501		PSE	M	43	16.2286
				PME	M	118	16.91		PSE	M	97	32.7059
				PME	M	14	0.676634		PSE	M	49	2.5983
				PME	M	135	7.41766		PSE	M	43	11.8596
				PME	M	35	1.54123		PSE	M	31	3.45146
				PME	M	13	3.50158

## Sheet: P7 USV call types
	PME																											PSE
Complex	36	16	12	18	4	2	3	2	82	45	9	0	1	10	1	11	1	1	5	12	5	2	9	49	4	0	Complex	3	1	0	0	3	9	1	1	1	3	4	2	0	1	0	1	2	2	2	6	2	17
Complex Trill	0	1	2	6	5	0	0	0	15	3	0	0	0	2	0	2	0	0	2	2	1	1	1	0	0	0	Complex Trill	0	0	0	0	0	1	1	0	1	0	2	0	0	0	0	0	0	0	2	5	2	1
Downward Ramp	13	34	35	44	20	8	3	1	15	3	0	0	0	2	0	2	0	0	2	2	1	1	1	0	0	0	Downward Ramp	0	8	4	1	1	11	10	5	1	3	7	5	1	0	0	0	1	4	8	25	3	14
Flat	76	33	116	39	8	0	0	7	70	58	9	0	5	28	4	9	5	5	36	27	12	11	29	50	9	12	Flat	8	11	4	12	7	27	17	8	9	14	4	1	1	1	1	6	4	7	5	9	11	13
Inverted U	16	15	21	12	1	1	2	2	5	28	5	0	1	10	0	3	2	2	10	10	1	1	22	8	5	1	Inverted U	4	8	1	0	2	5	9	1	3	11	11	2	0	2	0	1	3	5	3	7	1	0
Short	1	0	2	0	2	0	2	0	8	7	4	0	0	2	0	0	2	0	1	1	2	0	1	2	1	0	Short	0	2	1	0	0	3	1	2	5	2	1	0	0	1	1	1	0	0	1	0	0	1
Split	1	1	5	4	1	0	0	0	0	6	0	0	0	2	0	1	0	0	0	1	0	1	1	0	0	0	Split	0	0	0	0	0	0	0	0	0	0	2	0	0	0	0	0	0	2	0	1	4	3
Step Down	8	2	18	14	16	4	0	1	7	11	1	0	0	4	0	7	0	0	4	3	1	2	4	2	3	0	Step Down	0	0	1	0	1	5	3	0	0	1	5	0	0	0	0	0	0	2	0	3	3	4
Step Up	19	20	1	34	36	12	0	0	4	13	2	0	0	13	0	4	0	3	3	30	0	8	10	0	0	0	Step Up	0	2	0	0	1	6	7	2	0	2	1	0	0	0	0	1	0	6	4	16	6	17
Upward Ramp	24	18	73	37	1	11	3	2	35	25	9	0	3	26	6	6	1	4	28	37	8	8	43	24	3	0	Upward Ramp	0	8	3	0	3	19	10	5	6	13	10	5	1	1	0	4	3	12	6	39	11	27
Trill	1	2	0	4	0	0	0	0	0	0	1	0	0	2	2	0	0	0	0	0	0	0	0	0	0	0	Trill	0	0	0	0	0	0	2	0	0	0	0	0	0	0	0	0	0	1	0	0	0	0
[truncated: 3 more columns]
