# Supplementary material for: Prenatal methadone exposure disrupts behavioral development and alters motor neuron intrinsic properties and local circuitry
Source: eLife. 2021 Mar 16;10:e66230. doi: 10.7554/eLife.66230 (PMC7993998; doi:10.7554/eLife.66230)
Supplement: Figure 5—figure supplement 5—source data 1. [file elife-66230-fig5-figsupp5-data1.xlsx]

## Sheet: PPI Acoustic Startle
			Prepulse Inhibition
		Pre-Pulse DB	PME-Male										PME-Female									PSE-Male										PSE-Female
		65	-7.18647	-27.462	-77.7987	-38.1204	-7.89596	47.4533	-18.1619	10.1495	-1.62192	-10.0414	-5.92316	18.7956	45.8933	-2.04267	19.3277	-33.1739	5.46291	40.8284	5.82765	17.9825	-11.265	-29.0476	37.6596	23.2072	-5.13259	13.2526	7.02427	-2.64572	-41.8919	2.75163	-10.5927	1.56794	31.9686	17.236	21.1974	40.1692	-5.9329	-8.29042
		75	47.9098	1.74451	-54.0922	-39.9683	12.1226	37.0406	-32.1663	38.8331	10.2908	10.559	5.49627	45.6934	41.0666	14.2079	48.9262	-11.6557	46.5785	43.8462	17.8859	25.1316	17.5439	-24.966	7.65957	49.212	41.0322	12.6652	2.68199	-9.30136	-20.128	-8.83418	41.2673	-1.17596	28.1794	32.3758	24.1909	56.9935	9.49263	-21.1123
		85	44.7158	-19.8649	-11.9473	-27.7719	3.34417	65.2805	12.2538	40.4756	46.6443	58.178	54.9093	35.3285	41.1833	8.98774	44.6312	11.8948	11.6734	46.2722	39.9876	45.1316	-2.58541	-4.55782	32.2872	32.4665	49.9002	31.9016	35.6641	60.4382	31.5789	43.5192	43.5057	19.1638	43.946	54.6584	26.3754	39.5719	21.1948	11.174
			Decible Response Curve
		Db	PME-Male										PME-Female									PSE-Male										PSE-Female
		Background	16.375	17.5	30.875	20.125	11.625	18.375	25.625	21.125	22.625	19	15	18.75	19.375	11.625	14.125	17.125	19.5	24	15.5	13.5	16.5	21.5	25.125	15.5	14.5	16.25	22.875	20.75	19.5	27.25	15.875	22.25	14.75	14.875	17.375	18.375	13.625	13
		65	14.875	24	23.625	18	21	19.75	31	11.375	30.375	22.75	16.25	17.25	12.375	12.75	20.25	19.875	14.75	23.125	16.125	16.75	21.375	21	17	18	20.5	12.875	15.75	22.25	15.125	18.375	17.125	16.625	15.875	13.25	12.625	18.625	15.375	22
		75	17.125	25.125	16.25	15.875	16.5	17.875	18	21.375	20.875	17.75	22.875	15.625	19.25	19	24	17.75	20.75	18.125	17.875	19.75	22.875	16	13.25	16.875	15.75	12.25	13.5	27.625	19.75	21.5	19.5	20.625	17.125	36.125	15	20.25	15.875	32.75
		85	18.875	23	27.375	19.75	19.75	29.625	30.5	22.875	35.125	19	26.875	34.625	19	23.25	23	19.75	24.875	35	37.375	29.375	26	16.875	34	32.75	18	18.25	41	47.125	24.5	32.625	19.25	42.25	21.625	18.125	19.25	34	25	20.125
		95	58	51	73.5	48.125	47.375	109.25	31.75	69	33.5	65.375	38.375	39.5	124.75	30.375	35.875	37.25	36	26.625	42.875	122.75	25.625	30.125	58	102.125	33.375	46.875	138.875	37.875	22.125	26.625	38.875	50.875	69.25	24.25	28.875	34.375	70.75	41.5
		105	85.75	178	176.75	197.5	298.75	172.25	75.875	235.375	169	90.375	148.75	224.375	184.625	210.875	77	150.625	76.5	75.875	177.5	244.375	71.875	215.375	188.75	132.25	191.875	200.375	348.625	180.125	160.75	93	215.75	81.5	159.5	49.625	62	167.875	317.5	189
		115	266.125	222.125	132.875	236.75	269.125	387.75	114.25	509.875	223.5	120.75	234.25	342.5	321.125	275.375	267.75	209.125	217.375	211.25	403.25	285	135.375	183.75	235	317.25	438.375	340.5	391.5	302.375	175.75	172.625	396.5	287	287	161	154.5	251.125	305.5	242.75
