# Supplementary material for: Prenatal methadone exposure disrupts behavioral development and alters motor neuron intrinsic properties and local circuitry
Source: eLife. 2021 Mar 16;10:e66230. doi: 10.7554/eLife.66230 (PMC7993998; doi:10.7554/eLife.66230)
Supplement: Figure 5—source data 1. [file elife-66230-fig5-data1.xlsx]

## Sheet: Body Temperature P1
						Surface Body Temperature (Celsius)
						Group	Sex	Baseline	2 min			Group	Sex	Baseline	2 min
						PME	F	33.1	29.3			PSE	F	31.3	29
						PME	F	33.3	29.8			PSE	F	31	27.3
						PME	F	31.4	28.6			PSE	F	30.3	28.9
						PME	F	31.6	27.3			PSE	F	29.8	26
						PME	F	32.1	29.9			PSE	F	32.6	26.6
						PME	F	32.3	30			PSE	F	32.6	27.1
						PME	F	32.6	29.5			PSE	F	28.8	25.5
						PME	F	32.3	28.1			PSE	F	32.4	27.2
						PME	F	33.2	29.8			PSE	F	32.3	29.5
						PME	F	32.7	30.1			PSE	F	29.9	27
						PME	F	35.5	31.1			PSE	M	32.9	28.9
						PME	F	35.2	31.9			PSE	M	33	28.1
						PME	F	34.6	30			PSE	M	32.4	29.5
						PME	F	33.3	29.4			PSE	M	32.5	28.5
						PME	F	34.7	30.3			PSE	M	30.8	28.6
						PME	F	33.6	30.8			PSE	M	31	28.6
						PME	F	31.2	27			PSE	M	29.8	26.6
						PME	F	32.8	28.6			PSE	M	29	26
						PME	M	30.9	28.3			PSE	M	29	26.2
						PME	M	33.3	30.6			PSE	M	29.2	26.3
						PME	M	31.7	29.6			PSE	M	32.1	27.7
						PME	M	34	30			PSE	M	31.6	29.2
						PME	M	33.5	29.8			PSE	M	30.1	27.9
						PME	M	32	29.5			PSE	M	30.3	28
						PME	M	33.2	29.3			PSE	M	31.6	29.1

## Sheet: P1 Jerks
					Group	Sex	Total Jerks		Group	Sex	Total Jerks
					PME	F	9		PSE	F	20
					PME	F	16		PSE	F	16
					PME	F	18		PSE	F	15
					PME	F	30		PSE	F	31
					PME	F	25		PSE	F	9
					PME	F	23		PSE	F	7
					PME	F	28		PSE	F	5
					PME	F	23		PSE	F	5
					PME	F	22		PSE	F	10
					PME	F	22		PSE	F	9
					PME	F	17		PSE	M	24
					PME	F	5		PSE	M	12
					PME	F	16		PSE	M	8
					PME	F	24		PSE	M	19
					PME	F	6		PSE	M	19
					PME	F	19		PSE	M	11
					PME	F	19		PSE	M	10
					PME	F	27		PSE	M	22
					PME	F	23		PSE	M	23
					PME	M	10		PSE	M	20
					PME	M	18		PSE	M	29
					PME	M	18		PSE	M	24
					PME	M	24		PSE	M	5
					PME	M	34		PSE	M	15
					PME	M	9		PSE	M	9
					PME	M	19

## Sheet: Open Field Locomotion & Jumps
					Total Distance Traveled (cm)							Total Distance Traveled (cm)							Jumps				Jumps
					Group	Sex	P1	P7	P14	P21		Group	Sex	P1	P7	P14	P21		Group	Sex	Jumps		Group	Sex	Jumps
					PME	F	0.609433	41.1547	91.744	872.288		PSE	F	1.66351	41.0244	39.2059	392.881		PME	F	44		PSE	F	7
					PME	F	0.350301	21.5676	21.5368	812.508		PSE	F	1.12786	6.52559	64.6023	516.237		PME	F	37		PSE	F	2
					PME	F	0.26204	42.0969	61.6826	197.382		PSE	F	0.774603	5.53137	59.4793	315.187		PME	F	0		PSE	M	1
					PME	F	0.906822	23.3996	147.437	721.884		PSE	F	1.40994	22.4861	13.413	696.613		PME	F	45		PSE	M	12
					PME	F	0.863544	5.17881	45.8487	481.883		PSE	F	12.442	13.7941	183.753	542.601		PME	F	49		PSE	M	6
					PME	F	0.512315	13.401	93.7482	553.982		PSE	F	0.376847	16.1584	80.3414	334.948		PME	F	16		PSE	M	7
					PME	F	1.85059	74.158	97.5852	742.913		PSE	F	1.69591	18.2548	100.849	388.112		PME	F	48		PSE	M	23
					PME	F	0.667044	50.5264	434.553	1670.96		PSE	F	5.33245	13.4307	106.616	286.459		PME	F	148		PSE	F	0
					PME	F	0.916991	64.6481	133.26	672.531		PSE	F	6.31057	7.94236	52.0303	502.554		PME	F	36		PSE	F	11
					PME	F	1.00194	2.52009	124.989	880.428		PSE	F	10.6907	16.7599	141.692	410.148		PME	F	52		PSE	M	5
					PME	F	1.42254	1.24162	267.466	672.899		PSE	M	0.667352	11.0992	35.3111	372.148		PME	F	24		PSE	F	7
					PME	F	1.38647	14.4768	58.2128	749.007		PSE	M	0.829603	31.199	113.255	547.646		PME	F	23		PSE	F	0
					PME	F	2.07538	51.6492	40.3519	562.603		PSE	M	1.40937	7.35423	46.981	462.029		PME	F	26		PSE	F	0
					PME	F	0.538646	12.1307	89.8837	544.344		PSE	M	2.1675	16.4055	97.8949	561.273		PME	F	19		PSE	M	0
					PME	F	1.85973	30.7971	109.691	734.058		PSE	M	1.55113	1.17593	285.813	799.879		PME	F	20		PSE	M	4
					PME	F	0.880661	35.7082	60.2019	381.489		PSE	M	0.405009	19.4527	75.7667	260.368		PME	F	8		PSE	M	0
					PME	F	0.393429	26.3163	120.468	542.071		PSE	M	3.4473	1.16303	328.859	381.902		PME	F	15		PSE	M	0
					PME	F	0.606473	24.0265	59.8486	572.256		PSE	M	1.56659	0.327107	134.736	576.168		PME	F	5		PSE	F	2
					PME	F	0.499642	15.3957	218.035	560.089		PSE	M	1.50784	12.2631	279.592	719.607		PME	F	11		PSE	F	4
					PME	M	1.96219	44.1326	230.14	655.906		PSE	M	1.1847	0.813731	143.242	243.16		PME	M	26		PSE	F	1
					PME	M	0.202191	45.501	188.374	687.038		PSE	M	15.9703	16.2286	291.006	371.9		PME	M	47		PSE	M	1
					PME	M	1.73719	16.91	125.555	844.534		PSE	M	0.560743	32.7059	236.466	534.813		PME	M	22		PSE	M	2
					PME	M	1.60941	0.676634	75.3853	581.88		PSE	M	2.8163	2.5983	124.867	423.398		PME	M	26		PSE	M	2
					PME	M	0.57925	7.41766	40.6682	459.255		PSE	M	2.54955	11.8596	461.929	621.422		PME	M	4		PSE	M	3
					PME	M	1.14167	1.54123	170.894	553.876		PSE	M	2.03981	3.45146	221.412	509.877		PME	M	11		PSE	M	3
					PME	M	1.59821	3.50158	131.177	490.266									PME	M	17
					PME	M	0.236815	2.3747	6.2401	29.9785

## Sheet: USV
				Group	Sex	P1	P7	P14	P21			Group	Sex	P1	P7	P14	P21
				PME	F	0	198	15	40			PSE	F	15	15	138	1
				PME	F	0	142	65	3			PSE	F	0	40	32	0
				PME	F	17	285	22	0			PSE	F	1	24	113	12
				PME	F	0	212	13	7			PSE	F	17	26	43	0
				PME	F	10	94	13	0			PSE	F	55	47	56	11
				PME	F	15	38	60	4			PSE	F	12	15	16	8
				PME	F	15	15	13	2			PSE	F	38	3	30	1
				PME	F	0	242	124	1			PSE	F	15	41	100	1
				PME	F	0	214	53	0			PSE	F	21	31	59	0
				PME	F	19	40	7	3			PSE	F	44	111	28	3
				PME	F	0	4	8	1			PSE	M	1	86	28	0
				PME	F	0	53	438	10			PSE	M	1	61	39	0
				PME	F	0	11	45	2			PSE	M	0	14	23	0
				PME	F	1	17	58	33			PSE	M	2	13	34	0
				PME	F	0	98	40	11			PSE	M	3	18	4	3
				PME	F	0	40	67	0			PSE	M	0	50	118	0
				PME	F	1	156	12	3			PSE	M	96	6	6	5
				PME	F	0	138	6	1			PSE	M	3	2	49	10
				PME	F	0	26	14	0			PSE	M	9	14	88	4
				PME	M	0	13	35	0			PSE	M	9	13	15	39
				PME	M	0	14	9	0			PSE	M	5	43	58	1
				PME	M	1	118	0	0			PSE	M	0	97	20	5
				PME	M	10	14	3	0			PSE	M	0	49	217	5
				PME	M	2	135	67	0			PSE	M	30	43	3	6
				PME	M	0	35	5	0			PSE	M	0	31	24	1
				PME	M	0	13	106	0

## Sheet: Sensoriomotor Milestones
		Postnatal Day Milestone Achieved									Postnatal Day Milestone Achieved
		Group	Sex	Surface Righting	Negative Geotaxis	Forelimb Grasp	Cliff Aversion	Extinguishment of Pivoting Behavior			Group	Sex	Surface Righting	Negative Geotaxis	Forelimb Grasp	Cliff Aversion	Extinguishment of Pivoting Behavior
		PME	F	15	7	14	8	13			PSE	F	9	10	10	9	15
		PME	F	9	11	11	12	13			PSE	F	10	6	10	12	14
		PME	F	15	11	12	10	14			PSE	F	11	14	11	5	14
		PME	M	15	8	11	13	14			PSE	F	15	7	12	7	13
		PME	F	15	6	13	9	12			PSE	F	14	9	15	8	14
		PME	F	15	7	10	7	15			PSE	F	11	10	11	5	13
		PME	F	14	7	10	9	15			PSE	F	9	6	9	10	12
		PME	F	6	7	12	11	15			PSE	F	8	5	11	8	13
		PME	M	10	8	13	9	15			PSE	F	9	7	10	5	13
		PME	F	15	8	12	12	10			PSE	F	8	6	10	6	14
		PME	F	15	10	13	9	15			PSE	M	13	6	9	7	12
		PME	F	14	6	13	7	15			PSE	M	12	7	11	8	13
		PME	M	13	7	11	8	15			PSE	M	9	5	9	9	15
		PME	F	14	11	11	7	15			PSE	M	15	11	10	11	14
		PME	M	15	7	12	7	15			PSE	M	8	6	11	8	13
		PME	F	8	7	10	12	12			PSE	M	9	11	11	8	15
		PME	F	15	13	10	10	15			PSE	M	9	9	10	10	12
		PME	F	11	6	11	8	15			PSE	M	8	6	9	5	13
		PME	M	14	10	10	11	15			PSE	M	9	6	10	7	13
		PME	F	15	8	11	7	12			PSE	M	9	10	12	5	15
		PME	M	13	6	10	6	13			PSE	M	7	7	10	6	14
		PME	F	15	7	11	8	13			PSE	M	7	14	11	7	13
		PME	M	10	7	11	9	14			PSE	M	9	8	11	6	14
		PME	F	15	6	12	13	12			PSE	M	10	5	10	5	14
		PME	F	12	11	13	11	14
		PME	F	15	7	13	8	15
