# Supplementary material for: Prenatal methadone exposure disrupts behavioral development and alters motor neuron intrinsic properties and local circuitry
Source: eLife. 2021 Mar 16;10:e66230. doi: 10.7554/eLife.66230 (PMC7993998; doi:10.7554/eLife.66230)
Supplement: Figure 6—source data 1. [file elife-66230-fig6-data1.xlsx]

## Sheet: Sheet1
			Group	Sex	Striatum (R)	Striatum (L)	Cortex	Hippocampus (R)	Hippocampus (L)	Thalamus	Cerebellum	Basal Forebrain-Septum	Hypothalamus	Amygdala (R)	Amygdala (L)	Brain Stem	Superior Colliculus	Olfactory Bulb	Midbrain (R)	Midbrain (L)	Inferior Colliculus (L)	Inferior Colliculus (R)		Group	Sex	Striatum (R)	Striatum (L)	Cortex	Hippocampus (R)	Hippocampus (L)	Thalamus	Cerebellum	Basal Forebrain-Septum	Hypothalamus	Amygdala (R)	Amygdala (L)	Brain Stem	Superior Colliculus	Olfactory Bulb	Midbrain (R)	Midbrain (L)	Inferior Colliculus (L)	Inferior Colliculus (R)
			PME	F	0.01006	0.009999	0.099115	0.008636	0.007929	0.022532	0.049931	0.010128	0.010429	0.004933	0.004299	0.039658	0.006561	0.013952	0.002182	0.00937	0.001488	0.002669		PSE	F	0.009833	0.009857	0.099098	0.009683	0.007801	0.022952	0.05288	0.010282	0.010457	0.004818	0.004259	0.043713	0.007319	0.01481	0.002501	0.010015	0.001834	0.002788
			PME	F	0.01002	0.010043	0.098076	0.009052	0.008144	0.023909	0.04775	0.010493	0.011091	0.004938	0.004521	0.038869	0.006627	0.013433	0.002274	0.009422	0.001588	0.002484		PSE	F	0.010116	0.009908	0.093399	0.008673	0.00676	0.021383	0.044762	0.010357	0.010353	0.004758	0.004259	0.042289	0.005822	0.01365	0.002091	0.008332	0.001392	0.002082
			PME	F	0.009433	0.009394	0.088218	0.007999	0.006692	0.021283	0.046665	0.009517	0.009887	0.004432	0.003971	0.033892	0.005789	0.011616	0.001962	0.008187	0.001373	0.002299		PSE	F	0.010341	0.009489	0.094318	0.008951	0.007665	0.022876	0.041807	0.009967	0.010366	0.004912	0.00432	0.042458	0.005578	0.013749	0.002005	0.008952	0.001356	0.002018
			PME	F	0.010312	0.009606	0.102757	0.009758	0.008081	0.022354	0.050265	0.010156	0.010353	0.004987	0.004655	0.030309	0.006332	0.013124	0.002355	0.009349	0.001679	0.002308		PSE	F	0.010537	0.010008	0.096451	0.008498	0.007307	0.021364	0.043236	0.01045	0.010254	0.004847	0.004213	0.043155	0.00571	0.014728	0.002011	0.008173	0.001361	0.002175
			PME	F	0.009145	0.00951	0.088169	0.007433	0.007062	0.02052	0.045549	0.009408	0.009716	0.004241	0.004178	0.042455	0.005812	0.012913	0.001928	0.008645	0.001301	0.002353		PSE	F	0.009665	0.00955	0.101243	0.009258	0.008589	0.023055	0.050529	0.010257	0.010544	0.004739	0.004308	0.042467	0.007566	0.013669	0.002217	0.009877	0.001649	0.00287
			PME	F	0.010483	0.009861	0.103356	0.010102	0.008622	0.023916	0.046824	0.010467	0.01016	0.004762	0.004802	0.047608	0.006797	0.014072	0.002442	0.009449	0.001682	0.002421		PME	M	0.010918	0.011166	0.105631	0.008856	0.008549	0.022683	0.047505	0.011234	0.010975	0.005118	0.004833	0.042523	0.005695	0.016179	0.002005	0.008249	0.001495	0.002166
			PME	F	0.010156	0.010287	0.10032	0.010324	0.008392	0.025263	0.039087	0.010186	0.010046	0.004865	0.004343	0.037232	0.006655	0.014169	0.002292	0.009305	0.00142	0.002098		PME	M	0.010394	0.011117	0.100675	0.009049	0.007221	0.022358	0.049601	0.010694	0.010654	0.005139	0.004678	0.047121	0.006048	0.015131	0.00218	0.008959	0.001555	0.002432
			PSE	M	0.009573	0.010065	0.094315	0.008311	0.007597	0.021077	0.047706	0.010116	0.010065	0.004629	0.004208	0.036668	0.005529	0.013838	0.001998	0.008418	0.001392	0.002292		PME	M	0.010883	0.010432	0.107332	0.009194	0.008077	0.020791	0.052564	0.010703	0.010016	0.005214	0.004437	0.043819	0.006259	0.017019	0.002154	0.008455	0.001651	0.002617
			PSE	M	0.009704	0.010598	0.101286	0.009101	0.008788	0.023757	0.05085	0.010236	0.01079	0.004713	0.004514	0.029483	0.006849	0.013913	0.002397	0.009962	0.001644	0.002606		PME	M	0.010795	0.010144	0.10065	0.008221	0.006907	0.019826	0.047633	0.010156	0.009725	0.005022	0.004182	0.044892	0.005621	0.016151	0.002	0.007894	0.001556	0.002416
			PSE	M	0.011354	0.011199	0.112256	0.010402	0.008399	0.025802	0.044916	0.01105	0.01111	0.005174	0.00461	0.032089	0.006573	0.014787	0.002349	0.009235	0.001544	0.002166		PME	M	0.010746	0.010296	0.101608	0.009038	0.00737	0.021877	0.051545	0.010656	0.010357	0.005055	0.004514	0.036386	0.006311	0.01442	0.002218	0.00911	0.001668	0.002381
			PSE	M	0.011153	0.011342	0.11092	0.010484	0.010467	0.02625	0.042284	0.010781	0.011173	0.005492	0.005475	0.043162	0.007143	0.015727	0.002269	0.010161	0.001476	0.002372		PME	M	0.012827	0.011777	0.11132	0.013063	0.009276	0.034278	0.035431	0.011723	0.008853	0.002725	0.005026	0.031197	0.006876	0.01158	0.002444	0.009728	0.001282	0.001773
