# Supplementary material for: Prenatal methadone exposure disrupts behavioral development and alters motor neuron intrinsic properties and local circuitry
Source: eLife. 2021 Mar 16;10:e66230. doi: 10.7554/eLife.66230 (PMC7993998; doi:10.7554/eLife.66230)
Supplement: Figure 7—figure supplement 1—source data 1. [file elife-66230-fig7-figsupp1-data1.xlsx]

## Sheet: ACC
	Cux1 Positive Cell (#/mm2)
	PSE-Female								PME-Female								PSE-Male										PME-Male
Bin10	200	0	0	0	0	0	0	0	0	0	0	0	0	0	0	0	0	0	0	50	0	0	0	0	0	0	0	0	0	0	0	0	0	0
Bin9	50	0	100	0	0	200	0	0	0	0	0	0	0	0	0	0	0	50	0	0	0	0	0	0	0	100	0	0	0	0	0	0	0	0
Bin8	50	200	150	0	0	100	0	0	0	0	0	0	0	0	0	0	0	0	0	0	0	0	50	0	0	100	0	0	0	0	0	0	0	0
Bin7	0	150	0	0	150	50	0	0	0	0	50	0	0	0	0	0	0	0	0	0	150	0	0	0	0	0	50	0	0	0	0	0	0	0
Bin6	50	0	0	0	50	0	0	200	0	0	0	0	0	0	0	0	0	150	0	0	0	0	50	0	0	0	0	0	0	0	0	200	0	0
Bin5	0	200	150	0	150	250	250	50	150	0	0	0	0	200	300	100	100	350	150	0	150	0	0	50	0	0	0	0	250	0	100	400	0	0
Bin4	450	300	200	300	200	600	250	450	50	200	0	100	200	250	300	150	250	300	150	200	250	50	150	200	150	200	100	350	200	0	50	500	200	450
Bin3	1750	1750	1850	2100	2150	1850	2150	2000	1950	2200	1800	2200	1400	2000	2300	1500	1950	2200	1000	1250	1750	1850	2250	1400	1050	750	1800	1850	2450	2050	1600	1750	1850	2100
Bin2	1450	1100	1250	1400	1850	650	1150	1550	1450	1600	900	950	1550	2100	2350	1500	1300	1150	2400	2350	1550	1400	600	1450	1300	1250	2100	1450	2250	1600	2250	1500	1150	1200
Bin1	0	0	0	0	0	0	0	0	0	50	0	0	0	0	0	0	0	0	50	150	0	0	0	50	0	50	0	0	0	0	0	0	0	0
	NeuN Positive Cell (#/mm2)
	PSE-Female								PME-Female								PSE-Male										PME-Male
Bin10	1000	1400	1300	1600	1350	950	2050	1500	1300	1250	1050	1500	1150	1550	1350	1400	950	1250	1850	1650	2050	1450	1600	1050	1300	1250	1700	1450	1150	1600	1350	1600	2100	1800
Bin9	950	1450	1250	1900	1500	1650	1300	1300	1450	1500	1350	1700	1900	1900	1900	1850	900	1600	1400	1750	1600	1400	1700	1000	1800	1100	1800	1800	1650	1900	1300	1300	1950	1900
Bin8	1400	1600	1800	1750	1900	2150	2050	1600	1600	1250	1850	1650	2650	2000	2100	2100	1850	2050	1850	1600	1900	1900	1250	1500	1500	1350	1600	1950	2400	2100	1350	1550	2050	1550
Bin7	1450	1700	1400	1750	1550	2000	1900	2300	1850	1600	2100	1900	1800	2100	1900	2400	1900	1550	2100	1600	2250	2150	1400	1500	1600	1950	2050	1600	1800	1800	1750	1450	1850	2350
Bin6	1100	1500	1700	1600	1500	1650	1500	1400	1150	900	1650	1900	1450	1700	1700	2100	1450	1450	1700	1250	1650	1250	1150	1150	1200	1600	1650	1400	1550	1450	1500	1300	1400	1450
Bin5	1450	1300	1250	1300	1550	1550	1550	1450	1450	1150	1700	1550	1800	1600	1300	1600	1750	1500	1400	1750	1600	1600	1450	1400	1350	1450	1800	1200	2000	1400	1400	950	1450	1100
Bin4	1850	1050	1200	1750	1600	1250	1350	1350	1300	1100	1500	1450	1450	1550	1750	1450	1500	1350	1550	1650	1700	1600	1550	1100	1400	1400	1100	1400	1850	1550	1200	1000	1500	1300
Bin3	1450	1850	1550	1900	2000	1600	1700	1750	1450	1450	1600	1600	1600	1300	1600	1550	1850	1700	1300	1550	1550	1750	1600	1450	1300	1250	1350	1450	1550	1300	1450	900	1900	1650
Bin2	1000	1250	1750	1600	1400	800	1550	1750	1450	900	1250	1300	1750	1150	1750	1700	1600	1100	1850	2050	1400	1550	1000	1550	1400	1750	1500	1400	1500	1450	1100	1000	1200	1150
Bin1	50	150	50	50	300	50	200	50	200	100	100	150	100	200	100	50	250	100	350	250	100	200	100	200	100	350	50	250	150	50	150	150	150	250
