# Supplementary material for: Prenatal methadone exposure disrupts behavioral development and alters motor neuron intrinsic properties and local circuitry
Source: eLife. 2021 Mar 16;10:e66230. doi: 10.7554/eLife.66230 (PMC7993998; doi:10.7554/eLife.66230)
Supplement: Figure 7—figure supplement 2—source data 1. [file elife-66230-fig7-figsupp2-data1.xlsx]

## Sheet: S1
	Cux1 Positive Cell (#/mm2)
	PSE-Female								PME-Female									PSE-Male										PME-Male
Bin10	123.116	181.076	323.106	0	0	0	61.3767	184.166	124.24	0	65.1728	0	0	0	239.358	0	0	129.029	193.583	62.3426	63.3779	0	0	0	67.2165	0	0	0	0	61.6184	0	0	0	0	0
Bin9	0	301.794	0	184.13	237.406	247.204	0	552.499	186.36	132.274	130.346	0	220.446	195.559	179.518	0	189.673	451.602	387.167	0	253.512	0	0	0	67.2165	61.8743	0	61.5699	0	61.6184	194.587	130.237	0	0	0
Bin8	61.5578	1026.1	775.453	736.521	296.757	865.213	613.767	368.333	559.079	462.959	521.383	371.863	881.784	651.864	359.036	457.067	252.897	516.116	903.39	436.398	570.401	58.8824	163.682	226.291	134.433	123.749	391.69	800.409	296.308	246.474	454.035	390.712	0	384	306.463
Bin7	123.116	784.663	323.106	429.637	178.054	123.602	61.3767	61.3888	745.439	264.548	65.1728	297.49	146.964	0	359.036	0	126.448	451.602	64.5278	62.3426	443.645	58.8824	491.046	226.291	201.649	61.8743	65.2816	369.42	296.308	184.855	713.484	260.474	456.971	128	122.585
Bin6	0	60.3587	0	61.3767	0	556.208	122.754	429.721	0	0	0	0	0	0	0	0	0	129.029	0	0	0	176.647	0	0	0	0	0	0	59.2615	0	0	0	0	0	0
Bin5	1723.62	2112.55	2455.6	1166.16	1424.43	3522.65	2884.71	3621.94	807.559	1322.74	3323.82	2008.06	2204.46	2477.08	658.233	1436.49	1201.26	903.203	2645.64	2680.73	1774.58	2178.65	1145.77	1357.74	2150.93	1856.23	3916.9	2647.51	1125.97	2279.88	1881	1367.49	2219.57	3456	3064.63
Bin4	3570.35	3500.81	3748.02	3743.98	3917.19	3955.26	3068.84	3069.44	3727.19	3902.08	3780.03	3346.77	3968.03	3911.18	4009.24	3525.94	2781.87	3870.87	4194.31	3802.9	4753.34	2473.06	4473.98	3620.65	4234.64	4393.07	4112.74	3632.63	3852	3265.78	3826.87	4623.42	4178.02	5568	4474.36
Bin3	2523.87	2655.78	2132.5	3007.46	3442.38	3275.45	1902.68	2823.88	3478.71	2976.16	2346.22	1784.94	2939.28	2803.02	3470.68	2677.1	3034.76	2516.07	2516.59	2119.65	2725.25	2649.71	3164.52	2376.05	3159.18	2041.85	2676.55	3078.5	2607.51	2711.21	2335.04	3711.76	2676.55	3072	3125.92
Bin2	2585.43	2112.55	2390.98	2025.43	2848.87	2904.64	2639.2	2701.11	2049.96	2910.03	2476.57	2082.43	2792.32	2346.71	2273.9	2350.63	1896.73	2387.04	2452.06	2743.08	2281.6	2649.71	2728.03	1697.18	3428.04	2536.84	2872.39	2585.94	3318.64	2526.36	1881	2344.27	3329.36	3008	2451.7
Bin1	1108.04	301.794	646.211	1534.42	2136.65	1112.42	429.637	184.166	1180.28	595.232	586.556	1189.96	1102.23	1629.66	1615.66	1175.31	821.915	1161.26	516.223	872.797	1267.56	1589.83	2891.72	2206.33	1545.98	1361.23	913.942	123.14	770.399	677.803	324.311	1432.61	1044.51	1280	1041.97
	NeuN Positive Cell (#/mm2)
	PSE-Female								PME-Female									PSE-Male										PME-Male
Bin10	1846.73	1991.84	1550.91	1227.54	1602.49	1421.42	1902.68	1596.11	1428.76	992.054	1629.32	1338.71	1469.64	2151.15	1495.98	1436.49	1390.93	1161.26	1806.78	1807.94	1901.34	1295.41	1364.02	1357.74	873.814	1051.86	1501.48	1416.11	1363.02	1478.84	1362.11	1758.2	2023.73	2176	1532.32
Bin9	1292.71	1991.84	1421.66	1350.29	1602.49	1854.03	1534.42	1596.11	1615.12	1653.42	1759.67	2008.06	1690.09	1760.03	1914.86	1305.9	1517.38	1741.89	1677.72	1870.28	2218.23	1413.18	2127.87	1697.18	1949.28	1237.48	1240.35	1539.25	1481.54	1786.93	1751.28	1823.32	2089.01	2240	1961.36
Bin8	861.81	1871.12	1550.91	1595.8	1958.6	2039.43	1534.42	920.832	2049.96	2248.66	1955.18	2528.67	1543.12	1890.41	1735.34	1697.68	1580.61	1612.86	2258.47	2057.31	2154.85	1413.18	1855.06	1866.9	1882.06	1423.11	1305.63	2031.81	1718.58	1540.46	1362.11	1627.96	2154.29	1920	1961.36
Bin7	923.367	1388.25	1227.8	1166.16	1246.38	988.815	982.028	1105	1490.88	1587.29	1498.97	1561.83	1102.23	1303.73	1376.31	1044.72	1011.59	1161.26	1290.56	810.454	1711.2	1001	1200.34	1074.88	1008.25	989.988	1632.04	1231.4	1244.49	1109.13	1037.8	1172.13	1632.04	896	1287.14
Bin6	984.925	965.74	1033.94	1350.29	1008.97	1421.42	1227.54	859.443	745.439	1256.6	1107.94	1338.71	1102.23	1108.17	1256.63	783.543	1011.59	1225.78	1290.56	810.454	950.668	1001	1309.46	848.59	739.381	928.114	783.379	800.409	770.399	677.803	713.484	1497.73	1109.79	768	1287.14
Bin5	1662.06	1931.48	2067.88	1166.16	1839.89	2224.83	2086.81	2271.39	1242.4	1455.01	1694.49	1710.57	1543.12	1890.41	1316.47	1436.49	1580.61	1290.29	1871.31	2057.31	2091.47	1648.71	872.971	1244.6	1613.2	928.114	1501.48	1723.96	1066.71	1725.32	1556.69	1237.25	2023.73	1920	1777.48
Bin4	2523.87	2414.35	2197.12	1964.06	2077.3	2472.04	2332.32	1657.5	2360.56	2314.79	2281.05	1487.45	2718.84	2542.27	2333.74	2285.33	1959.95	2128.98	2387.53	2805.42	2281.6	1766.47	1582.26	2206.33	1949.28	1484.98	2089.01	1539.25	2370.46	2341.5	2853.94	2669.86	2219.57	2304	2390.41
Bin3	1785.18	1508.97	1680.15	1841.3	2314.7	2348.44	1227.54	1411.94	1925.72	1984.11	1433.8	1264.34	1910.53	2020.78	2273.9	1828.27	1896.73	1677.38	1806.78	1433.88	2091.47	1943.12	1473.14	1244.6	1411.55	742.491	1762.6	1600.82	1540.8	1663.7	1556.69	1888.44	1501.48	1856	2267.83
Bin2	1846.73	1146.82	1938.63	1534.42	1958.6	1792.23	1595.8	1657.5	1366.64	2116.38	1694.49	966.844	1837.05	1825.22	1735.34	1958.86	1770.28	1419.32	1806.78	2119.65	1584.45	1648.71	1309.46	1244.6	1478.76	1175.61	1370.91	1723.96	1481.54	1602.08	1426.97	1367.49	1827.88	1216	1900.07
Bin1	492.463	60.3587	452.348	797.898	1246.38	1112.42	429.637	61.3888	1056.04	661.369	912.42	594.981	1028.75	1173.36	1436.14	848.838	695.467	967.718	580.75	374.056	1014.05	765.471	1745.94	1301.17	873.814	371.246	522.253	123.14	592.615	369.711	194.587	846.542	783.379	640	551.633
