# Supplementary material for: Prenatal methadone exposure disrupts behavioral development and alters motor neuron intrinsic properties and local circuitry
Source: eLife. 2021 Mar 16;10:e66230. doi: 10.7554/eLife.66230 (PMC7993998; doi:10.7554/eLife.66230)
Supplement: Figure 7—source data 1. [file elife-66230-fig7-data1.xlsx]

## Sheet: M1
	NeuN Postive Cells (#/mm2) in L2-L4
	PSE												PME
Female	1187.5	1437.5	1587.5	1562.5	1325	1337.5	1525	1562.5					1337.5	1225	1250	1412.5	1200	1362.5	1337.5	1412.5	1062.5	1212.5
Male	1237.5	1337.5	1375	1225	1300	1287.5	1175	1175	1312.5	1287.5	1175	1200	1350	1200	1037.5	1200	1300	1200	1437.5	1375
	NeuN Postive Cells (#/mm2) in L5
	PSE												PME
Female	925	1050	1125	1200	1262.5	937.5	1150	1112.5					1162.5	1025	937.5	1125	1012.5	1250	1075	1000	1137.5	1087.5
Male	1050	1137.5	1050	1087.5	1025	1150	537.5	975	1150	1137.5	787.5	1012.5	950	987.5	1100	1062.5	1087.5	1137.5	1237.5	1187.5
	Cux1 Postive Cells (#/mm2) in L2-L4
	PSE												PME
Female	1700	2200	2075	2175	2075	1987.5	2012.5	2125					1950	2025	2275	1912.5	1850	2000	2012.5	2325	1987.5	1937.5
Male	2300	1837.5	1900	1787.5	2175	2125	1475	1912.5	2150	1725	1850	1937.5	2100	2062.5	1725	1912.5	1837.5	2225	1950	2062.5
