# Supplementary material for: Prenatal methadone exposure disrupts behavioral development and alters motor neuron intrinsic properties and local circuitry
Source: eLife. 2021 Mar 16;10:e66230. doi: 10.7554/eLife.66230 (PMC7993998; doi:10.7554/eLife.66230)
Supplement: Figure 8—figure supplement 1—source data 1. [file elife-66230-fig8-figsupp1-data1.xlsx]

## Sheet: AP Firing
				Methadone Male															PME-Female																									PSE-Male
			-100	0	0	0	0	0	0	0	0	0	0	0	0	0	0	0	0	0	0	0	0	0	0	0	0	0	0	0	0	0	0	0	0	0	0	0	0	0	0	0	0	0	0	0	0	0	0
			-50	0	0	0	0	0	0	0	0	0	0	0	0	0	0	0	0	0	0	0	0	0	0	0	0	0	0	0	0	0	0	0	0	0	0	0	0	0	0	0	3	0	0	0	0	0	0
			0	4	0	0	0	0	0	0	0	0	0	0	0	0	0	0	0	0	0	0	0	0	0	0	0	0	0	0	0	0	0	0	0	0	0	0	0	0	0	0	8	0	0	0	0	0	0
			50	6	0	0	0	0	0	0	0	0	0	0	0	0	0	0	0	0	0	0	0	0	0	0	0	0	0	0	0	0	0	0	0	0	0	0	0	0	0	0	11	0	0	0	0	0	0
			100	9	1	0	0	0	0	3	0	0	0	0	0	0	0	2	0	0	0	2	0	0	2	0	0	0	0	0	0	2	1	0	0	0	3	0	0	1	0	0	13	0	2	1	0	0	0
			150	12	4	1	3	0	2	6	2	4	2	2	3	0	3	4	0	4	4	4	2	0	4	4	3	3	0	2	1	4	4	2	1	4	10	3	0	4	2	4	15	1	5	4	1	1	4
			200	13	6	4	6	1	5	7	5	7	5	4	7	3	6	6	1	6	7	6	4	2	7	7	6	6	4	6	4	7	6	5	4	7	11	4	3	6	6	7	17	4	7	7	5	4	7
			250	15	8	6	8	4	7	9	8	10	7	6	10	6	8	8	4	8	9	9	6	4	9	9	8	9	7	10	6	9	9	8	7	10	12	6	5	8	8	10	18	7	9	9	8	7	9
			300	16	9	8	10	6	9	11	10	13	9	8	11	8	11	10	6	9	11	10	8	6	10	12	10	11	10	11	9	11	10	10	9	11	13	8	8	10	9	12	8	9	11	10	10	9	11
			350	16	11	10	12	8	10	12	11	15	11	10	13	9	12	11	8	11	12	11	9	8	12	12	11	12	12	12	11	13	12	11	10	12	13	9	10	11	12	13	10	11	13	12	12	11	13
			400	17	12	11	13	10	12	13	12	16	12	9	14	11	12	12	10	12	14	13	10	9	13	14	13	13	14	12	12	14	13	12	12	14	14	11	11	12	12	15	7	12	13	13	13	12	14
			450	18	13	12	14	11	12	13	12	17	12	9	15	11	15	13	11	13	14	14	11	10	13	15	14	14	15	12	13	15	14	12	13	15	14	12	12	13	13	16	5	13	14	14	14	13	15
			500	18	14	13	15	12	13	14	13	18	13	9	16	12	16	14	12	14	15	14	11	11	14	15	15	15	15	13	14	16	15	12	12	15	14	13	13	14	14	17	5	14	15	15	14	14	15
[truncated: 22 more columns]
