# Supplementary material for: Prenatal methadone exposure disrupts behavioral development and alters motor neuron intrinsic properties and local circuitry
Source: eLife. 2021 Mar 16;10:e66230. doi: 10.7554/eLife.66230 (PMC7993998; doi:10.7554/eLife.66230)
Supplement: Figure 8—source data 1. [file elife-66230-fig8-data1.xlsx]

## Sheet: ephys intrinsic properties
								PME-Male																						PME-Female
								n=15																						n=26
		Resting membrane potential (mV)	-50.0078	-55.9696	-57.6571	-68.4117	-69.2995	-62.7549	-60.4431	-67.8378	-56.5729	-65.5015	-69.9874	-67.9632	-71.5807	-64.1783	-60.069	-70.5702	-64.2015	-59.0071	-64.0677	-65.008	-63.4108	-59.1391	-64.0784	-64.0056	-64.4347	-63.3155	-70.7382	-72.4668	-69.422	-66.519	-64.8501	-66.7023	-67.3285	-57.4834	-59.9488	-55.8835	-59.1979	-60.5892	-66.3714	-67.8156	-44.1903	-66.5238	-63.2962	-62.2571	-65.3721	-63.0916	-56.2981
		Holding current (pA)	-240	-300	-280	0	-20	-100	-110	-28	-200	-60	0	-12	8	-130	-140	0	-92	-170	-80	-85	-160	-190	-65	-100	-60	-105	0	30	0	-60	-60	-50	-52	-245	-125	-300	-200	-160	-53	0	-225	-55	-76	-125	NaN	-125	-160
		Input resistance (Mohm)	51.3781	49.1913	52.4519	67.468	69.4311	86.9922	74.8934	77.4306	75.2869	73.8775	96.9122	107.203	127.834	51.3258	65.8064	88.6664	61.6367	61.2355	66.0958	59.5742	40.4689	68.7087	90.4261	69.3759	88.9686	83.3466	91.4653	75.7087	75.1565	56.1291	74.9554	94.0194	64.6315	53.2367	100.071	40.3555	53.6359	66.4339	68.556	83.7109	83.7723	86.7697	68.8756	66.2423	78.8058	69.8374	95.8745
		Voltage Threshold (mV)	-47.0862	-36.3498	-32.7825	-41.6326	-35.5523	-34.8303	-40.1918	-40.2392	-36.7598	-39.3265	-38.9603	-38.5996	-35.4306	-41.3025	-38.1058	-37.3486	-40.2842	-36.2102	-41.2405	-37.8852	-36.6456	-31.3355	-39.8993	-38.6863	-37.6506	-38.4729	-37.0617	-39.3302	-39.8493	-45.9234	-40.6443	-38.0206	-36.3219	-38.3667	-33.8973	-38.3264	-28.5161	-35.8305	-41.187	-42.8855	-46.6915	-39.459	-43.0784	-40.5278	-39.9838	-39.9715	-33.29
		Current Threshold (pA)	200	400	400	150	250	250	200	200	350	200	150	150	200	250	200	200	200	250	200	200	350	300	200	200	200	300	150	150	150	150	150	200	200	350	200	400	350	250	200	150	150	200	150	250	250	300	300
		AP half-width (milliseconds)	0.00064667	0.00063891	0.00070692	0.00069491	0.00074095	0.00079533	0.00069894	0.00066019	0.00066225	0.00074523	0.00081943	0.00073333	0.00092183	0.00057791	0.00072624	0.00074147	0.00069412	0.00072558	0.00066402	0.00072998	0.00062002	0.0011033	0.00065876	0.00066654	0.00075002	0.00062563	0.00068521	0.00068249	0.00081094	0.00065521	0.00075455	0.00081915	0.00079228	0.0005813	0.00077908	0.00067585	0.00072762	0.0006213	0.00080012	0.00080144	0.00069898	0.00066746	0.00073426	0.00062315	0.00084703	0.00062209	0.00073711
		Tau (milliseconds)	0.0022	0.002	0.002	0.0035	0.0024	0.0032	0.0013	0.0017	0.0027	0.0028	0.0026	0.0018	0.002	0.0015	0.0015	0.002	0.0033	0.0033	0.0036	0.0021	0.0017	0.0037	0.0021	0.0012	0.0023	0.0021	0.0013	0.0022	0.0046	0.0024	0.0037	0.0017	0.0028	0.0013	0.0018	0.0031	0.0029	0.0023	0.0034	0.0026	0.0005	0.0016	0.0037	0.0033	0.0024	0.0027	0.0024
		FI Slope (Hz/pA)	0.094857	0.068	0.052	0.1	0.08	0.075714	0.074286	0.089143	0.108	0.08	0.08	0.112	0.089143	0.071429	0.047143	0.083429	0.074286	0.074286	0.08	0.058286	0.06	0.084571	0.091429	0.084571	0.093714	0.10514	0.12	0.096	0.092	0.092	0.084	0.089143	0.074762	0.084	0.081429	0.048	0.072	0.071429	0.077619	0.079333	0.088667	0.092571	0.084	0.075714	0.087143	0.089143	0.089143
		Voltage Sag (%)	39.6438	37.3661	41.5869	76.2723	68.5998	39.3924	54.5134	52.5597	36.138	34.1943	37.6556	24.6021	25.676	64.5381	62.2057	58.148	54.2603	41.952	55.4524	48.6698	68.1143	28.954	34.2623	39.3641	40.2412	36.0085	68.1398	69.663	58.2904	74.1919	46.7175	28.3361	64.8638	43.3822	38.6729	54.7291	39.6479	34.1114	53.7609	50.127	47.474	55.358	44.0708	56.5441	41.6095	36.9243	25.9652
		Voltage Overshoot (%)	17.6843	34.933	46.0523	61.5489	53.1765	43.5316	41.7947	49.9358	35.2865	41.7277	35.8718	24.8205	28.9675	58.8438	57.566	69.0577	53.145	38.4321	49.6465	45.9465	65.5564	28.242	35.02	41.0148	41.8009	37.2405	54.2052	61.1683	57.1517	73.0596	49.0518	36.9845	55.0675	39.7874	41.7541	53.7632	44.433	62.9845	60.2431	44.9999	37.7208	50.9024	43.1064	58.7035	44.2015	38.2597	29.0365
		Fast afterhyperpolarization (mV)	-4.5424	-3.3126	-2.7786	-4.7722	-8.2826	-4.1377	-5.7002	-8.2032	-5.1413	-0.7901	4.1974	-4.807	-3.8749	0.44613	-17.6566	-3.5338	-0.98097	0.44152	1.2472	-1.1282	-0.33659	4.0937	-1.7877	-3.3447	-6.1	-7.0493	-7.3249	-6.4711	-2.1362	-1.7143	-2.9635	-5.7884	-5.6117	0.5409	-2.131	-1.8745	-6.2143	-3.3191	-0.50648	-4.8172	-1.2902	-3.8633	-0.68514	-1.4187	-0.69083	-2.7927	-4.776
		Medium afterhyperpolarization (mV)	-8.4231	-9.7046	-11.6365	-7.8871	-14.415	-9.7899	-11.7548	-5.4387	-2.3704	NaN	21.0502	-7.4806	-5.3739	-13.8174	-17.6501	-15.0458	-16.3542	-18.0271	-13.7172	NaN	-19.4866	-11.299	-12.8844	-15.8237	-8.6893	-5.3491	-7.2275	-9.9818	-11.3121	-16.7177	NaN	-10.5062	NaN	-11.5617	NaN	-13.3022	NaN	-12.1576	-10.6169	-2.5394	-8.3506	-10.4694	-12.7099	-5.0203	-3.9809	-4.9018	-5.068
		Afterdepolarization (mV)	0.64244	1.7067	0.19468	0.077872	0.25308	0.46074	1.1875	4.7307	5.0812	58.3781	45.075	3.2576	1.7391	58.5014	0.032447	0.1817	60.5196	58.7415	54.2963	2.2258	52.1159	50.5325	71.8565	0.38287	0.915	3.9585	2.5503	2.7385	0.88255	67.2296	1.6742	0.75276	2.5438	62.7	0.94095	69.0466	1.1551	1.1746	60.1562	4.8605	0.70734	0.4867	0.49968	3.0435	1.804	3.4718	1.9598
		Height (mV)	87.7814	91.2112	92.1151	91.9969	81.5039	82.216	85.449	90.2596	83.9963	84.9211	83.9385	83.0522	77.9622	95.0802	92.6752	85.3832	83.7439	89.9166	83.9279	91.8965	85.8354	60.7067	90.2896	91.6528	83.6605	81.2511	79.8789	80.7067	78.1824	90.1228	86.0054	89.2739	77.9645	92.9297	79.784	86.8218	80.6326	90.5427	82.3754	72.2502	80.9687	91.1796	86.9794	89.3996	72.178	90.2125	80.4226
[truncated: 22 more columns]
