# Supplementary material for: Prenatal methadone exposure disrupts behavioral development and alters motor neuron intrinsic properties and local circuitry
Source: eLife. 2021 Mar 16;10:e66230. doi: 10.7554/eLife.66230 (PMC7993998; doi:10.7554/eLife.66230)
Supplement: Figure 8—source data 2. [file elife-66230-fig8-data2.xlsx]

## Sheet: PSE-Male 8
map.genMean = [
-0.666 -1.203 0.443 0.249 -0.226 -0.589 -0.585 -1.043 1.716 NaN -6.497 -0.784 -0.091 -0.156 -0.582 0.838
-0.833 0.762 -0.497 -0.741 -1.321 -1.609 -0.675 -1.082 -2.286 -12.400 -29.367 -2.772 -0.419 -1.655 -1.651 0.176
-0.762 0.173 0.269 -1.439 -0.402 -1.308 -11.473 -9.459 -31.696 NaN -44.244 -3.210 -0.442 -0.735 -4.447 0.873
-1.066 -0.090 0.232 -1.635 -1.284 -0.189 -10.168 -7.422 NaN NaN -22.552 -5.557 -0.575 -0.916 -0.421 0.719
-0.792 0.138 -0.602 -0.954 -0.495 -3.106 -6.858 -0.019 NaN NaN -1.522 -0.888 -1.340 -1.092 -0.129 0.187
0.622 -0.032 -1.438 -0.147 -2.449 -4.232 -1.425 NaN NaN NaN NaN -1.434 -0.151 -0.623 0.738 -0.115
-0.549 -1.411 -1.014 -4.683 -0.208 -28.253 -15.736 NaN NaN NaN NaN -0.590 -0.936 0.466 -0.689 0.888
0.596 -0.685 0.468 -9.544 -19.416 -8.141 NaN NaN NaN NaN NaN -8.497 -0.294 -0.988 -1.114 -0.433
0.159 0.551 0.164 0.184 0.427 -2.753 -1.572 NaN NaN NaN NaN -2.638 -0.758 -0.306 0.722 0.335
-0.856 -1.619 -0.357 -0.630 -0.226 -0.011 -0.292 -11.908 NaN 23.743 -2.606 -3.065 -0.038 1.374 -0.629 -2.011
-0.375 -1.380 0.174 -0.430 -1.010 -0.851 1.123 2.865 -27.845 -9.513 -14.375 -14.934 -4.612 0.316 0.034 0.154
-1.857 -0.564 0.356 -0.388 -0.495 0.872 -1.294 2.266 2.587 -5.736 -1.033 -2.060 -0.857 -0.765 -0.006 0.172
0.172 -1.298 0.156 -0.910 0.199 0.836 -0.699 1.798 1.161 0.064 -0.573 -0.829 -1.463 -1.466 -0.074 0.061
-0.736 -0.261 -1.032 -0.067 0.024 0.157 -0.100 0.094 -0.125 -0.539 -0.358 0.529 -0.447 -0.114 -0.686 -0.495
-0.693 -1.188 -0.961 -0.863 0.091 -0.390 -0.984 -0.697 -0.826 -0.728 0.643 -0.462 -0.350 -0.071 -0.304 -0.932
0.957 -1.225 0.629 0.213 -0.737 0.215 -0.406 0.204 0.335 -0.263 -0.766 0.362 -0.999 0.270 -0.355 -0.824

## Sheet: PSE-Male 7
map.genMean = [
-0.260 -0.931 0.440 0.934 -0.482 -0.279 -1.137 0.387 1.117 NaN -2.770 1.403 0.077 -1.683 -0.089 1.447
-0.229 -0.386 -0.245 0.636 0.170 -0.157 -4.495 -1.479 -11.174 NaN 6.700 -5.250 0.191 0.628 -0.246 0.114
-0.203 -0.178 0.026 0.241 -0.925 -0.942 -1.477 -7.808 -10.898 -5.023 -7.575 -6.284 0.811 1.053 -1.403 -0.785
0.453 -0.673 -0.518 0.963 -0.446 0.031 -2.896 -15.127 -14.210 -5.755 0.440 -0.561 -0.911 -0.518 0.958 0.400
-0.062 -0.418 -0.195 -0.203 -0.215 -0.345 -3.721 -12.921 NaN NaN -2.644 0.003 0.209 -0.762 -0.136 0.136
0.722 -0.208 0.244 -1.305 -0.154 -0.435 -0.802 NaN NaN NaN -4.634 -5.802 -0.704 -0.075 0.282 0.978
0.076 1.094 -0.699 0.394 -5.322 -4.954 -36.885 NaN NaN NaN NaN -0.241 -0.088 -1.054 0.584 -0.125
1.103 -0.384 0.265 1.647 -4.100 -0.322 -10.326 NaN NaN NaN NaN 0.573 0.352 -1.323 0.384 0.201
0.938 -0.002 -0.861 0.131 -1.882 -1.682 -25.996 NaN NaN NaN -1.435 -0.848 -0.627 -0.117 -0.759 0.476
-0.319 -1.304 -0.748 0.699 -1.242 -1.119 -3.611 -19.818 -3.733 9.313 -2.564 0.318 -0.976 0.939 0.266 -1.176
-0.253 -0.384 -0.675 -0.282 -1.488 -0.495 -0.531 -2.519 1.090 -0.592 -13.097 -0.721 -8.843 -0.702 1.595 -1.020
-1.071 -0.584 0.063 -1.445 0.891 -0.196 -0.896 -0.501 -4.796 -0.777 -4.312 -1.252 -1.615 0.318 0.159 -0.689
-0.851 0.168 -0.118 -0.990 0.535 0.559 1.227 -0.603 -2.478 -2.681 0.136 -4.719 -0.264 0.022 -0.073 0.415
-0.507 -1.217 -0.285 0.692 -0.036 0.292 -0.827 0.320 -1.832 -1.347 0.044 -0.969 -0.376 0.543 1.116 -0.098
2.036 0.432 -0.418 -0.780 -0.254 -0.378 1.043 0.670 -0.491 -0.504 0.130 -1.585 0.208 0.817 0.296 0.210
1.448 0.176 -0.854 -0.740 -0.973 0.198 0.046 -2.434 0.520 0.011 -0.240 0.154 -0.114 0.042 0.663 -0.781

## Sheet: PSE-Male 6
map.genMean = [
-0.122 -0.336 0.017 2.213 -0.118 -0.398 -1.507 -5.424 -0.810 1.076 -1.498 0.117 -1.246 0.373 0.299 -1.280
0.348 -0.238 1.676 -0.081 1.346 -0.713 -8.360 NaN -4.492 3.227 -4.938 -1.420 -7.736 -5.187 -9.688 0.108
0.162 0.392 -0.252 0.122 0.787 0.871 -21.483 -12.009 -29.683 -7.438 -5.905 -4.367 0.672 -2.169 -1.416 -0.666
0.864 -0.643 0.816 -0.207 -2.910 -6.671 -0.943 1.178 -5.866 1.244 -1.359 -1.781 -1.047 -0.014 0.964 0.136
0.600 0.084 -6.876 0.437 -9.058 -25.696 -0.704 NaN NaN NaN -1.351 0.086 -1.581 -0.044 1.102 -2.602
0.208 -0.091 -0.735 -2.345 0.510 -1.309 -6.641 -2.473 NaN NaN -2.318 -10.790 -1.195 -0.242 -0.748 -1.558
-1.508 0.806 -1.731 -2.638 -1.444 -0.355 -0.641 NaN NaN NaN -0.937 -2.020 0.232 -1.171 -0.272 -1.014
-0.128 -0.152 0.736 0.527 0.087 -3.459 NaN NaN NaN NaN 1.114 -2.454 1.271 0.345 -1.220 -0.493
-0.129 0.408 -0.058 -0.085 -0.209 -3.638 -52.137 NaN NaN NaN -2.168 -2.363 -0.834 -3.368 -0.447 0.745
-1.468 -0.864 -1.630 0.682 -3.130 -1.269 -22.858 -46.242 -29.375 -37.970 -6.429 -1.416 1.334 -6.945 -27.071 -0.541
-1.444 0.096 0.385 0.174 -0.116 -0.176 -0.194 -0.496 -5.898 -9.948 -6.028 -3.934 -4.202 -14.510 -7.134 0.448
-1.440 0.646 -0.116 0.258 -0.167 -0.177 -0.598 -3.318 -1.114 -2.983 -1.411 -4.519 0.135 -0.626 -0.986 0.215
-1.139 0.365 0.706 0.160 -0.745 0.849 -0.615 -1.264 -0.957 -0.227 -0.777 -0.177 1.465 -0.624 0.873 0.058
-0.876 0.698 0.404 -1.381 -0.348 0.702 -0.461 0.269 0.512 0.137 -1.671 0.093 0.016 -0.370 1.009 -0.899
1.579 -0.660 -1.154 0.334 -0.581 0.495 0.960 0.203 0.931 0.248 -0.189 -0.971 -1.076 0.157 -0.228 -0.438
-0.661 0.815 0.482 0.439 -0.137 1.029 0.187 1.094 0.932 1.357 -0.586 0.545 -0.088 1.183 -0.489 0.211

## Sheet: PSE-Male 5
map.genMean = [
-0.7194 -0.4664 0.4707 -0.1278 0.2214 -0.8495 -0.2485 -0.5332 -0.4932 0.4302 0.5015 -0.1778 0.6179 -0.8485 0.0193 -0.8877
0.1485 -0.2508 0.0933 0.1101 -0.1749 -0.6168 -0.3813 -1.2909 0.2730 -7.1471 -2.2208 -0.8894 -1.0362 -0.1250 0.2206 -0.7797
0.8120 -0.1452 -0.5327 0.3528 -0.7380 -0.2337 0.0376 -0.5516 -5.8582 -4.5923 -3.4398 -0.9786 -0.2303 0.0800 0.2010 0.2782
0.5114 -0.9417 -0.6585 0.5680 -1.1408 -1.1176 0.4998 -1.1738 -3.1778 0.4923 -1.5198 -1.2089 -1.3632 0.2554 0.2098 -0.0378
2.4737 -0.5516 -0.5799 0.3000 0.2711 0.0471 -0.6758 -0.9208 NaN -2.7014 -0.4993 -0.0313 -0.0540 -0.3936 -0.0997 0.1303
0.7670 -0.9047 -0.3006 0.3175 -0.9775 -0.5325 -0.2712 -5.7963 NaN -9.1104 -4.3016 -1.2355 0.3387 -0.7538 -0.7099 0.0687
-0.4796 1.2051 -0.5721 0.1955 -0.9076 0.4618 -5.5809 -32.9161 NaN NaN NaN -2.6895 -1.8117 -1.3205 -0.7511 0.3436
0.3327 0.2320 0.4804 0.6739 -0.7249 -0.6335 -0.4597 -67.0557 NaN NaN NaN -4.7470 -1.0290 0.6419 -0.6256 -0.3698
-0.3641 0.5979 0.2153 0.6361 -0.1493 -1.8634 -1.4083 -6.2267 NaN NaN NaN -1.9902 -2.5137 0.4533 -0.5538 -1.0805
0.8500 0.5241 0.3063 0.4833 -0.9668 0.2204 -0.6001 NaN NaN NaN -30.0100 -4.5978 -0.6665 0.6306 -1.4599 1.3529
0.1251 0.1651 0.0472 -0.6447 -0.7037 -1.2251 -0.7548 -0.7982 -2.3689 -6.6493 -3.3707 -1.9490 -29.5444 -8.6836 0.0872 -0.1132
0.2287 -1.1246 -0.4329 -0.7063 0.3909 0.0375 -0.3205 1.3013 -0.3501 -4.4415 -6.0450 -2.5473 -0.1837 0.8629 0.4870 -0.8000
0.3314 -0.1188 -0.0051 -0.3714 0.4402 0.1097 -0.0180 2.3561 1.4339 -1.5803 -4.5161 -2.1112 -1.3012 0.0348 0.1593 0.9540
0.3831 -0.4944 0.8968 -1.1796 -0.1157 -0.3498 -0.3726 0.4274 -0.6579 -0.8007 -1.4354 -0.2812 -0.5939 0.3331 -0.0221 0.5522
0.7381 -0.6006 -0.4118 -0.2580 -0.7529 0.5915 -0.1284 0.7003 -0.5029 -0.3557 0.9446 0.4706 -0.4622 0.0717 0.5137 0.0960
-0.2454 0.1031 0.2274 -0.4449 -0.8008 0.6287 -0.5791 -0.4998 -0.9133 0.5140 0.4374 -0.7536 -0.1703 0.5182 0.2497 -0.0620

## Sheet: PSE-Male 4
map.genMean = [
-0.0799 -0.0116 -0.1388 0.8667 -0.5022 0.3527 0.4401 -2.1713 -1.4462 -1.9670 -0.7767 0.7480 -1.1010 -0.1426 0.6507 0.6946
0.3771 -0.9881 -0.7609 0.6865 1.0041 -1.3764 -1.3692 -4.5585 -62.2465 -19.9295 -5.4487 -0.1282 -1.0749 -0.0616 -0.1968 0.8185
0.6773 -0.0979 -0.0192 -0.0892 0.0154 -0.4924 -3.7018 -0.1120 -7.1137 NaN 0.2459 -1.6919 -0.6823 -0.3989 -0.5007 0.0282
-0.8798 -0.1435 0.2232 -0.5486 -0.5291 -1.1803 -1.2573 -1.4026 -0.3991 NaN 0.7638 -2.0492 0.1753 -0.9314 -1.0385 1.0718
1.2850 0.7885 -0.9676 0.2436 -0.4760 -0.4088 -3.9786 -4.2880 -4.2835 NaN -0.7279 -1.5493 -2.6329 -0.4641 -0.5818 0.0959
-0.2605 -0.8528 -1.5392 -0.1073 -3.5494 -7.3718 -3.4123 -15.6978 NaN NaN NaN -1.1326 0.2369 0.3594 -0.3312 0.6732
0.9698 0.7376 -0.6639 -6.6081 0.2319 -13.9885 NaN NaN NaN NaN NaN -1.4394 -0.8067 -0.7091 -5.0959 -0.3045
-0.9774 -0.2320 0.2598 1.6215 -6.0805 -1.3259 -24.1528 NaN NaN NaN NaN -1.8924 -0.8534 0.3847 -0.2955 -1.8584
0.1432 -0.1310 -0.1828 -0.1149 -14.2102 -1.7925 -8.1087 NaN NaN NaN NaN -2.5808 -1.2343 -1.1615 0.4951 -1.1970
-0.6450 -0.3085 0.3937 -0.2670 -2.0504 -0.3625 -0.7048 -12.0931 NaN -4.0344 -17.5915 -1.2678 -3.8078 -0.4906 0.4920 -0.1001
-0.6808 -0.6464 0.4996 0.0076 -0.1417 -1.3520 0.0188 -1.3358 -2.2319 -7.6277 -23.7435 -1.9863 -1.2397 -0.9916 0.1355 0.5282
0.5139 0.2404 -1.1147 0.3691 -0.2117 -0.3409 -1.7543 0.5433 -0.3292 -0.0150 -1.2089 -0.4859 0.8061 -0.4516 0.0763 -1.5569
-0.7998 -1.3041 -0.0871 0.9627 0.9651 0.7596 0.6998 0.5726 0.1331 -0.1900 -1.2410 -0.1284 0.7378 0.5218 -2.0826 0.0902
0.9908 0.1038 -0.5101 0.7660 -2.4703 -1.6329 -0.2808 -0.5409 -0.6829 0.9117 -0.3543 -0.6296 0.4637 -0.1636 -0.3729 0.0155
0.1952 0.8711 -0.5086 0.1075 -0.3357 -1.0159 0.2714 0.7871 0.4435 -0.0641 -0.6546 -1.6088 -1.1166 0.5703 -1.0863 0.0844
0.0927 -0.2557 -0.2285 0.4818 0.5145 -0.6248 -0.1326 -0.8763 1.2327 0.2552 0.2912 -0.0598 0.2623 -0.7733 -1.7423 -0.1393

## Sheet: PSE-Male 3
map.genMean = [
1.0123 -1.1086 0.1231 0.2121 0.7794 0.0627 1.0880 -0.5178 0.1232 -1.6935 0.1780 1.4513 -1.2727 -0.0201 -0.3978 0.0262
-0.0930 -0.1197 -0.1799 0.5468 0.6064 0.2032 1.3697 0.4943 -0.4883 -1.5516 0.1760 -0.8614 -0.5164 0.1092 0.3183 -0.1595
-1.1193 -0.6458 -0.3949 -0.3277 -0.1938 -0.4541 -1.3880 -2.7540 -1.0089 -7.2809 -0.3931 -0.1715 -0.3533 -0.8703 0.2780 -0.3112
-0.9892 1.0605 -1.8968 0.4881 -0.2248 -0.2937 -0.5874 -1.0480 -0.6523 -1.4069 -2.2276 -0.5827 -4.2657 -0.8579 1.3629 -0.4875
0.1444 0.2035 0.0197 1.0749 0.0097 -0.9942 -1.4278 -2.4218 -2.5945 -3.6064 -0.1612 -4.7929 -0.7268 0.2561 0.0536 -0.8036
-1.4719 0.0373 -1.1904 -0.2678 0.3888 0.1355 -2.5295 -4.2793 NaN 4.5737 -2.0577 0.0021 -0.1504 -0.2455 -0.3158 -0.8853
0.1581 -0.0619 -1.2283 -0.6508 -10.1556 -9.9579 -11.1399 NaN NaN NaN NaN -1.4722 -0.6634 -1.3447 -0.8463 -0.6565
0.3178 1.7896 -0.5145 0.4319 -0.1862 -2.0186 -5.8444 NaN NaN NaN NaN -5.2829 -1.1062 -1.8489 -0.0922 -0.4298
-1.0796 -0.0464 -0.4039 0.0573 -1.5298 -7.4567 -9.9722 NaN NaN NaN NaN -1.5667 -3.0438 -0.3016 -1.5171 -0.5407
0.1328 0.9786 0.7189 -1.2595 -0.9866 -2.2374 -0.7069 NaN NaN NaN NaN -1.2274 -1.0847 0.1143 -1.4023 0.2241
0.0321 -0.0665 1.4563 -0.1302 -1.4892 -0.4414 -0.7085 -3.7132 NaN NaN NaN -2.0110 -2.8493 -0.5328 -10.4826 -0.0665
-2.9467 0.4739 -2.0085 -0.4372 -0.2576 0.6122 -0.8177 -0.5977 -0.0658 -0.5419 -5.3087 -0.7850 -0.8752 -0.4675 -0.9284 -0.4754
-1.3890 -1.1277 -5.9597 0.4558 0.5291 0.1801 -1.0032 -1.0618 -0.5494 -0.4258 -1.3420 -0.6599 -0.0595 0.0618 0.0920 -0.8008
-0.2223 -0.9340 0.4366 -0.4146 0.4799 -0.6788 0.0202 0.5403 -1.3737 1.1316 -0.9462 0.0558 0.3752 -0.3607 -0.3143 -0.2736
-0.7801 -0.6589 -0.4344 0.3030 -0.5035 1.0531 0.0272 0.2280 0.3169 0.0707 -1.1597 0.2145 -0.7028 -0.5928 -0.9607 -0.7055
-0.4772 0.4375 0.2432 -0.0881 0.6487 -0.0439 -0.4412 -0.4913 -0.0137 0.0457 -5.3826 0.4262 -0.2275 -0.1080 -1.6634 0.5707

## Sheet: PSE-Male 2
map.genMean = [
-2.2514 0.5304 -0.4191 1.7970 0.0286 0.5723 -0.5528 -1.4931 1.8364 -1.6179 0.7705 0.8055 -0.1848 -0.7549 0.0180 -0.9610
1.0725 0.1034 0.4011 0.0385 0.0875 -0.7218 -8.0965 -1.0545 1.0101 -2.6755 2.3388 0.2289 0.2851 1.2716 0.7331 0.6868
-0.3425 -0.3313 3.3017 0.7303 -0.0122 -0.1078 -1.0679 -2.1466 3.1157 -1.1644 1.3096 -0.3124 -2.4057 1.0815 -0.0783 0.9475
0.4312 0.8780 0.7353 0.1855 -0.1835 -0.5084 -1.0370 -1.5657 -0.9029 -0.2215 -1.4162 0.7490 0.4596 -0.4195 -0.2125 -0.2303
-0.0498 0.3507 -0.2492 -0.3527 -0.5037 0.3648 -0.9958 -0.1297 -5.2557 -2.0048 -5.2132 -1.5492 2.0788 0.1497 -0.6278 1.5956
-0.5699 0.3801 -0.0099 1.0953 -1.2678 0.8755 -1.5837 -0.2381 -5.0742 6.2472 -7.1397 0.9428 -1.6418 -1.3511 -0.7734 -0.5288
0.1447 -0.8486 0.8638 -0.0263 -0.7273 -13.3163 -1.0256 -1.8975 NaN NaN -3.0955 -1.2860 -0.1096 -0.6514 -1.0832 -0.3994
1.4208 0.4443 -0.7237 -2.1018 -0.1261 -1.1536 -25.6079 NaN NaN NaN NaN -0.5098 -0.1071 0.4117 -0.7433 1.8497
-0.8938 0.4227 0.2306 0.3771 1.8246 -0.9344 -2.4806 NaN NaN NaN NaN -1.9863 -2.5229 -1.1357 0.0451 0.6867
0.1137 -0.3858 -0.0642 1.3105 -1.6567 -9.7939 -4.6597 NaN NaN NaN NaN 1.6018 -11.8175 0.4987 -1.1780 -0.1700
0.0243 -1.5152 -0.1356 0.4202 0.4194 1.5221 -5.5197 -4.7328 -39.5147 -9.4451 -6.1776 -0.0280 -0.5717 0.0385 1.2796 -2.2586
0.9657 -0.7195 -0.3169 -3.1282 -0.9864 -0.6967 0.5234 0.1521 -0.1354 0.4156 -1.5096 -2.9241 -12.0225 -3.0440 0.8757 -3.7771
-0.7116 0.9569 -0.4702 0.4677 -0.3920 0.3652 -0.6359 -0.9830 1.6406 0.8402 0.1786 -1.3047 1.9861 -1.5099 -0.3476 -1.5353
0.1748 -0.5851 -2.2709 2.3055 1.6865 1.7868 0.0002 1.4028 -0.2311 -0.1236 0.3528 -1.1973 0.3680 0.4638 0.9405 0.5140
-0.0017 -1.3280 0.7261 -0.4716 0.0470 -0.5471 1.7829 1.2766 -0.5230 -0.6394 1.5858 0.0808 0.6207 1.4741 1.2650 0.0195
0.7909 0.6678 0.2127 -0.1568 1.4177 -0.3297 0.5683 -1.0485 0.4783 0.6762 -1.0001 -0.4634 0.7767 0.0761 1.2815 -0.3665

## Sheet: PSE-Male 1
map.genMean = [
0.792 -0.649 0.316 -1.308 0.689 -0.171 0.101 0.425 0.379 -3.873 1.854 -0.542 0.351 -0.761 -0.249 0.588
-0.466 -0.191 0.298 0.334 0.559 -0.001 0.084 -7.521 -39.497 -37.049 -4.404 -1.429 -0.056 0.778 -0.157 0.095
0.113 0.428 0.237 1.555 0.598 0.126 -1.796 -2.751 -22.184 -12.318 -0.479 0.002 0.675 0.324 0.212 0.105
-0.896 -0.753 -0.566 -0.668 0.259 0.247 -1.674 -0.105 -4.628 -0.909 -0.218 -0.304 -1.125 -0.745 0.403 -0.479
0.590 0.311 -0.799 -0.087 0.291 0.041 -0.433 -1.695 NaN -4.848 0.095 -0.277 -0.681 0.216 0.209 -1.151
0.649 -0.818 -0.774 0.122 -0.299 -0.497 -4.196 -3.037 NaN -2.187 -1.511 -2.970 0.757 0.401 0.002 -0.684
-0.718 0.075 -0.351 -0.011 -0.288 -0.495 -11.988 NaN NaN NaN -8.629 -5.705 0.477 -0.048 0.645 0.235
1.413 0.374 0.718 0.479 -8.803 -2.861 -24.547 NaN NaN NaN NaN -2.608 -0.958 0.417 0.543 -1.037
0.139 -0.864 -0.080 0.920 -6.874 -0.747 -23.096 NaN NaN NaN NaN -4.939 -2.514 -0.212 0.157 0.482
0.126 0.385 -0.248 0.428 -1.331 0.144 -5.700 NaN NaN NaN -11.611 -1.496 -1.116 -2.699 0.255 -0.791
-0.149 0.203 0.009 -0.166 0.267 -1.491 -0.793 -14.871 -31.111 -5.440 -4.189 -9.156 -8.337 -0.569 -0.878 0.503
-2.705 0.170 0.628 -0.393 -0.372 0.045 -0.594 -0.089 -2.149 -1.525 -2.033 -2.259 0.194 0.488 -1.601 -0.533
-1.433 0.356 -0.353 -0.013 -0.506 0.720 0.654 -0.613 1.469 -0.952 -5.374 -0.027 0.293 -0.027 0.380 0.672
1.973 -4.487 -0.124 -0.576 -0.903 0.220 -0.635 0.063 -0.338 -0.547 0.471 -0.396 -0.715 -0.659 -2.181 0.012
0.650 -1.249 -0.734 0.570 0.297 -0.862 -0.080 0.358 0.498 0.312 0.136 -0.172 -0.313 -0.549 1.196 -0.443
0.505 0.562 0.105 0.846 -0.601 0.041 -0.420 0.243 1.296 0.623 -0.148 -0.041 -0.246 0.595 -0.606 -0.839

## Sheet: PSE-Female 10
map.genMean = [
-0.0582 0.2765 0.3410 0.1476 -0.7155 -0.5627 0.6512 -3.8465 1.8200 1.6705 -0.5344 0.4796 -0.0493 -0.6245 0.5472 0.3125
0.0408 0.1193 0.1030 -0.0686 -0.1233 -1.7023 -3.0232 -12.9636 -28.6481 -15.6254 0.8590 0.6593 -0.7905 0.4670 0.2139 -0.1238
-0.9726 -0.0099 -0.0668 -0.5617 0.5685 -0.5010 -5.6977 -2.3924 -11.8317 -0.7312 -1.5222 -0.2645 -1.1953 -2.2156 -0.3112 -1.2607
0.4297 -1.5296 -0.2032 0.1207 -0.5016 -1.6021 -0.5503 6.4913 NaN -0.4955 0.1822 -0.4659 -0.4396 -0.5881 -0.6340 0.3351
-0.7954 0.0568 0.5835 0.1550 -0.2552 0.6278 -5.0514 -4.7602 NaN NaN -4.2188 1.0736 -0.5280 0.5663 0.4397 0.1516
0.2272 -0.3723 -1.3400 0.2911 -1.6196 -1.2407 -1.0191 NaN NaN NaN -9.8124 -1.4527 -0.8076 0.1289 0.3405 0.7055
0.7070 -0.0929 -1.2680 -1.8063 -0.9678 0.3067 -27.0354 NaN NaN NaN NaN 0.0413 -0.8000 -0.5988 -0.5323 1.0062
-0.3358 0.1131 -0.5435 -0.2336 -0.5938 -1.8209 -14.8818 NaN NaN NaN NaN -1.3379 -0.7024 -2.0301 -0.6562 -1.1361
0.3517 -0.2357 0.1881 0.7221 0.3528 -2.0884 -11.5923 NaN NaN NaN NaN -0.8076 -1.5159 0.5809 -7.1735 0.8716
-0.6416 -0.4950 -0.3136 -0.3299 -0.3156 -3.9495 -1.3530 -7.0813 -41.2469 -31.0302 -15.2123 -2.0972 -2.1716 0.3439 -1.2575 -0.6220
-1.2647 0.2210 -0.3992 0.6686 -0.7020 0.2194 -0.7230 -0.4053 -3.3370 -6.2703 -8.2731 -4.0558 -0.8581 -6.4246 -0.4184 -0.6482
0.6729 2.1911 0.7850 0.3836 -0.7807 0.5946 -0.0504 -1.1252 0.2315 -0.1933 -5.6194 -19.8653 -3.3135 -2.4762 -2.2618 0.1753
0.3410 0.2547 0.1559 0.7494 -0.0228 0.8275 -0.0558 2.3536 0.0975 -0.3717 -5.3033 -4.6887 0.0030 -0.1163 0.8526 0.5478
-0.3532 0.3933 0.4097 0.4669 -0.5726 -0.9375 1.3282 -0.2832 -1.0089 -3.8004 -0.2615 0.0814 -0.6984 0.3148 0.5590 0.3332
0.4540 0.4783 -0.4226 0.3256 -1.5835 -0.7695 0.5511 -0.1528 0.2201 NaN -0.6969 -0.4670 0.2009 -0.2140 0.0558 0.4073
0.4044 1.7715 -0.6777 -0.5061 0.7216 0.0894 -1.0102 -0.2840 0.5674 -0.4391 0.0240 0.0572 0.0371 -0.9156 0.4858 -0.1245

## Sheet: PSE-Female 9
map.genMean = [
-0.2142 -1.0551 -1.1440 0.4947 -1.0740 -0.4461 -0.1287 1.2020 -0.8501 2.2987 0.6293 -1.0216 0.8993 -0.2337 -0.2899 -0.4891
-0.6185 -0.8130 -0.6787 0.3079 -1.1199 0.3384 -1.2968 -1.2964 -6.8693 -11.3834 -18.8913 -9.3687 -0.5825 -0.6805 -1.4381 -0.7561
-1.1964 0.3609 -0.1702 0.1957 -1.9359 0.3377 0.1307 -0.5353 3.0700 -1.4879 -2.1936 0.2161 0.0903 -0.4218 0.8481 0.6287
-1.3893 0.0772 -0.8923 -0.1338 -0.2179 -0.3215 0.3070 -4.1046 -4.2850 0.7528 2.3075 -0.3457 -0.8086 0.3743 -1.3851 0.0406
-0.7864 -0.8076 -1.3928 0.3978 0.3074 1.1467 -5.4126 -2.1866 NaN NaN -4.4225 -0.5573 -0.1381 -0.1090 -0.3977 -0.5700
0.0914 -0.4108 0.0553 -0.7982 -4.1328 -0.4291 -2.8399 -1.0563 NaN NaN NaN -2.0833 -0.4293 0.7536 0.0555 0.0397
-1.1530 -0.0739 -0.0678 -0.6859 -1.8032 -5.4212 -1.2424 4.1719 NaN NaN NaN -0.8499 -0.6117 0.4735 -0.6148 -0.1462
-0.1914 0.7422 -0.4941 1.0283 -2.0982 -4.8248 0.0664 NaN NaN NaN NaN -7.1860 -2.3090 -0.8470 -0.5219 0.2166
-0.0325 -1.6370 0.5483 0.1890 -1.8584 -1.7283 -0.3306 -6.6171 NaN NaN 0.5944 -1.9111 -0.5074 0.5157 1.0342 -0.0201
-0.3364 -0.8479 -0.2284 -0.6312 -1.2252 -1.2282 -25.7495 -0.7651 -15.8114 -7.7081 1.9912 -0.2967 -1.5228 -2.6311 -0.4494 -0.9319
-0.3013 -0.0450 -0.9349 -0.3068 -1.7645 0.4486 -3.4878 -19.9788 -40.8707 -73.6906 -1.8768 0.3005 -0.0886 0.1210 -0.5057 -0.7055
0.1275 0.1926 1.2276 1.1892 -0.3360 -0.2755 0.2987 -1.3193 -1.2007 -8.5196 -0.6968 -2.1575 0.9492 -0.2582 -0.2901 -0.8792
-0.3430 0.2934 0.9904 -0.1758 -0.7436 0.0929 -0.4063 -0.1198 -0.1491 -0.4103 -0.4901 -0.2925 -0.1256 -0.1900 0.7092 -0.5866
-0.0041 0.2231 -0.2041 0.0278 -0.2035 -0.4041 0.0963 0.5675 0.1868 0.1847 -0.0597 -0.5464 -0.3727 -1.0362 -1.2344 0.6316
0.7460 -0.2078 -0.5101 0.1554 0.8211 0.2042 -1.0821 -0.6774 0.6804 -0.1976 -0.0142 -1.5254 1.0214 -0.2449 0.9090 -0.0376
0.1344 0.2447 -1.5705 -0.1195 -0.8885 -0.1423 1.3133 -0.1529 0.1253 -0.0166 -0.2447 -0.7645 0.1551 -1.7601 0.4875 0.8696

[truncated: 32 more sheets: PSE-Female 8, PSE-Female 7, PSE-Female 6, PSE-Female 5, PSE-Female 4, PSE-Female 3, PSE-Female 2, PSE-Female 1, PME-Male 10, PME-Male 9, PME-Male 8, PME-Male 7, PME-Male 6, PME-Male 5, PME-Male 4, PME-Male 3, PME-Male 2, PME-Male 1, PME-Female 1, PME-Female 2 …]
