# Supplementary material for: Prenatal methadone exposure disrupts behavioral development and alters motor neuron intrinsic properties and local circuitry
Source: eLife. 2021 Mar 16;10:e66230. doi: 10.7554/eLife.66230 (PMC7993998; doi:10.7554/eLife.66230)
Supplement: Figure 9—source data 1. [file elife-66230-fig9-data1.xlsx]

## Sheet: Morphology
		Intersections
		PSE-Female									PME-Female										PSE-Male					PME-Male
	50	36	40	29	32	31	26	8	32	39	44	24	23	23	33	28	42	37	36	37	39	44	36	28	22	30	28	40	31	34	33	30
	100	32	25	20	12	15	13	13	21	25	35	14	9	22	23	28	28	25	28	30	25	34	27	33	27	32	28	36	21	34	28	35
	150	13	8	7	6	7	2	9	10	8	10	4	3	8	9	21	5	12	19	11	7	14	11	22	9	12	9	18	8	15	13	19
	200	8	2	4	2	2	2	1	2	8	3	2	2	4	2	7	2	10	6	6	2	5	8	7	2	5	3	9	6	7	2	5
	250	2	2	4	5	1	2	3	2	6	2	1	2	2	5	6	2	2	2	2	2	5	2	4	2	2	2	5	2	1	2	3
	300	2	2	2	3	2	2	2	2	5	2	1	3	4	3	3	3	2	2	2	2	1	3	1	3	2	2	4	2	2	2	4
	350	2	2	2	3	2	3	2	3	5	2	1	3	3	3	4	3	2	3	2	3	2	2	1	3	2	2	1	1	3	3	3
	400	3	4	3	4	2	3	3	4	5	3	6	6	4	4	3	4	4	3	2	3	2	3	1	4	3	2	2	1	4	4	3
	450	2	5	4	10	6	6	4	10	9	4	9	14	7	5	3	7	4	3	4	3	2	3	2	4	2	2	3	2	4	14	3
	500	3	17	9	2	16	8	5	15	19	9	0	1	12	6	7	8	4	3	5	3	2	4	8	4	2	2	4	2	8	8	10
	550	2	5	14	0	3	3	7	0	0	7	0	0	19	4	17	1	7	5	0	4	2	4	14	7	3	2	4	3	13	2	14
	600	5	0	0	0	0	0	14	0	0	0	0	0	0	7	17	0	13	9	0	6	4	7	0	1	4	4	4	4	5	0	12
	650	2	0	0	0	0	0	10	0	0	0	0	0	0	0	0	0	2	4	0	7	4	7	0	0	16	7	7	4	5	0	0
	700	0	0	0	0	0	0	0	0	0	0	0	0	0	0	0	0	0	0	0	0	11	19	0	0	12	0	11	6	0	0	0
	750	0	0	0	0	0	0	0	0	0	0	0	0	0	0	0	0	0	0	0	0	13	13	0	0	0	0	11	12	0	0	0
	800	0	0	0	0	0	0	0	0	0	0	0	0	0	0	0	0	0	0	0	0	4	0	0	0	0	0	5	12	0	0	0
	850	0	0	0	0	0	0	0	0	0	0	0	0	0	0	0	0	0	0	0	0	0	0	0	0	0	0	0	0	0	0	0
		Length (mm)
		PSE-Female									PME-Female										PSE-Male					PME-Male
	50	1393.9	1558.5	1123.1	1371.8	1521	1049.3	372.5	1316.5	1590.8	1654.6	1012.8	1036.9	869.8	1362.3	1066.7	1702.3	1535.4	1247.1	1318.6	1613.2	1389.5	1579.2	780.2	742	1079.5	1278.8	1716.7	1447.5	1482.5	1171.1	1205.8
	100	2757.1	2298.2	2116.4	1724.3	1575.9	1750.7	911.7	1958.7	2136	2804.2	1576.1	935.6	1922	1849.9	2071.2	2808.6	2547.9	2205.3	2498.5	2330.6	2555.6	2293.6	2147.6	1595.3	2109.5	1902.5	2796.7	1971.4	2409.1	2323.1	2358.5
	150	1456.6	1102.6	1138.4	804.9	914.9	668.6	859.9	1145.4	1129.3	1441.9	614.8	385.7	1133.8	966	1763.7	1034.1	1457.5	1620	1298.6	1198.3	1800.1	1446.2	1626.7	999.6	1797.6	1332.1	1755.1	970.2	1635.8	1625.2	1934.7
	200	668.9	443.4	299.8	227.4	340.8	77.6	700.5	333.5	420.1	289.3	259.1	140.2	495	501.4	1069.8	236.2	818.5	772.2	691.4	422.2	712.6	654.4	874.3	271.8	471.9	453.5	997.2	751.2	894.7	341	783.4
	250	310.9	102.3	227.8	226.1	54.1	126.8	224.3	127	416.7	196.9	148.3	105.4	139.8	280.8	606.3	112.7	307.2	359.9	179.7	106.5	304.2	415.5	498	148.2	163.1	109.3	442.1	307.5	236.4	134.9	268.6
	300	104.7	107.3	148.2	185.7	86.6	112.4	188.7	75.6	287.6	107.1	53.5	111.7	144.3	234.4	247.6	141.2	102.3	115.4	178.1	107.5	185.2	160.6	186.7	230.5	122.5	114.9	375	205.6	123.8	105.2	172.8
	350	108.2	141.1	107.7	165.5	109	150	102.9	167.7	315.9	102.6	52.7	166.5	172.7	160.1	187	164.2	142.9	135.9	112.2	129.7	76.1	219.7	55.6	162.5	103.6	110.2	139.6	89.1	167.5	127	218
	400	189.1	145.7	197.6	187	106.8	161.8	119.3	169.3	272.2	122.6	224.8	277.7	197.4	178.5	178	184.9	227.7	163.4	112.5	160.8	106.6	149.1	52.5	203.8	215.3	119.8	75.9	52	185.6	191.3	160.6
	450	107.6	222.6	167.6	423.1	187.2	174.8	195	318.6	342.8	213.3	882.7	942.5	309.4	264.9	159.9	313.1	217.2	162.4	212.2	159.2	107.5	162.2	72	222.5	120.8	103.2	143.3	91	209.4	660.8	166
	500	116.5	762.7	564.8	892.2	663.6	418.6	222.2	1064.9	1010.4	410	136.6	482.1	532.8	273.7	320.9	454.9	221.2	158.8	276.8	163	112.8	171.8	299.3	277.7	103.3	103.4	232.9	103.9	346.6	1086.7	387.1
	550	160	1408.1	1136.8	101.5	1177	696.7	412.4	420.1	592.9	648.3	0	13.3	1219.4	310	559.9	506.2	266.1	234.7	96.6	192.3	105.9	217.7	954.3	293.3	133.6	105.1	212.5	131	930.8	335.7	768.7
	600	212.6	23.8	853.8	0	60.2	124.5	785.4	3.6	0	93.5	0	0	556.7	305.9	1445.9	13	699.1	426.9	0	329.7	160.8	255	469.2	702.1	186	155.1	213.4	227.9	730.3	18.5	1188.5
	650	551	0	0	0	0	0	1087.1	0	0	0	0	0	0	320.6	300.2	0	1039.8	1069	0	477.2	216.6	401.1	0	20	719.9	581	333.2	216	466.6	0	398
	700	14.4	0	0	0	0	0	279.4	0	0	0	0	0	0	0	0	0	50.8	73.8	0	228	340	994.2	0	0	1753.1	575.7	531.9	309.1	116.1	0	0
	750	0	0	0	0	0	0	0	0	0	0	0	0	0	0	0	0	0	0	0	0	877.5	1139.1	0	0	265.6	0	871.3	616.5	0	0	0
	800	0	0	0	0	0	0	0	0	0	0	0	0	0	0	0	0	0	0	0	0	715.3	467.6	0	0	0	0	757.7	1150.4	0	0	0
	850	0	0	0	0	0	0	0	0	0	0	0	0	0	0	0	0	0	0	0	0	54	0	0	0	0	0	163.3	480.3	0	0	0
