# Supplementary material for: Prenatal methadone exposure disrupts behavioral development and alters motor neuron intrinsic properties and local circuitry
Source: eLife. 2021 Mar 16;10:e66230. doi: 10.7554/eLife.66230 (PMC7993998; doi:10.7554/eLife.66230)
Supplement: Table 1—source data 1. [file elife-66230-table1-data1.xlsx]

## Sheet: Sheet1
		Pregnancy Rates					Obstructed Labor Rates					Litter Size at Birth			Male:Female at Birth (P0)					Male:Female at P7					Neonatal Deaths					Male:Female Neonatal Deaths
		Data analyzed	Pregnant	Not Pregnant	Total		Data analyzed	Obstructed Labor	normal	Total		Opioid	Saline		Data analyzed	Male	Female	Total		Data analyzed	Male	Female	Total		Data analyzed	Dead	Alive	Total		Data analyzed	male	female	Total
		Opioid	45	16	61		Opioid	6	36	42		8	8		Opioid	96	66	162		Opioid	90	90	180		Opioid	50	198	248		Opioid	18	5	23
		Saline	28	6	34		Saline	1	27	28		9	6		Saline	73	49	122		Saline	92	64	156		Saline	29	129	158		Saline	6	8	14
		Total	73	22	95		Total	7	63	70		5	6		Total	169	115	284		Total	182	154	336		Total	79	327	406		Total	24	13	37
												7	5
		Percentage of row total	Pregnant	Not Pregnant			Percentage of row total	Obstructed Labor	normal			6	7		Percentage of row total	Male	Female			Percentage of row total	Male	Female			Percentage of row total	Dead	Alive			Percentage of row total	male	female
		Opioid	73.77%	26.23%			Opioid	14.29%	85.71%			9	9		Opioid	59.26%	40.74%			Opioid	50.00%	50.00%			Opioid	20.16%	79.84%			Opioid	78.26%	21.74%
		Saline	82.35%	17.65%			Saline	3.57%	96.43%			7	7		Saline	59.84%	40.16%			Saline	58.97%	41.03%			Saline	18.35%	81.65%			Saline	42.86%	57.14%
												8	8
		Percentage of column total	Pregnant	Not Pregnant			Percentage of column total	Obstructed Labor	normal			5	7		Percentage of column total	Male	Female			Percentage of column total	Male	Female			Percentage of column total	Dead	Alive			Percentage of column total	male	female
		Opioid	61.64%	72.73%			Opioid	85.71%	57.14%			9	8		Opioid	56.80%	57.39%			Opioid	49.45%	58.44%			Opioid	63.29%	60.55%			Opioid	75.00%	38.46%
		Saline	38.36%	27.27%			Saline	14.29%	42.86%			4	4		Saline	43.20%	42.61%			Saline	50.55%	41.56%			Saline	36.71%	39.45%			Saline	25.00%	61.54%
												7	8
		Percentage of grand total	Pregnant	Not Pregnant			Percentage of grand total	Obstructed Labor	normal			7	9		Percentage of grand total	Male	Female			Percentage of grand total	Male	Female			Percentage of grand total	Dead	Alive			Percentage of grand total	male	female
		Opioid	47.37%	16.84%			Opioid	8.57%	51.43%			8	8		Opioid	33.80%	23.24%			Opioid	26.79%	26.79%			Opioid	12.32%	48.77%			Opioid	48.65%	13.51%
		Saline	29.47%	6.32%			Saline	1.43%	38.57%			9	10		Saline	25.70%	17.25%			Saline	27.38%	19.05%			Saline	7.14%	31.77%			Saline	16.22%	21.62%
												7	7
												7	5
												10	6
												10	9
												10	5
												7	7
												7	3
												7	6
												8	6
												8	7
												7	8
												10	6
												10
												9
												6
												2
												10
												4
												10
												9
												4
